# Supplementary material
Source: Royal Society of Chemistry journal article supplement (doi:10.1039/d6nr01141a)
Supplement: d6nr01141a13.pdf [file d6nr01141a13.pdf]

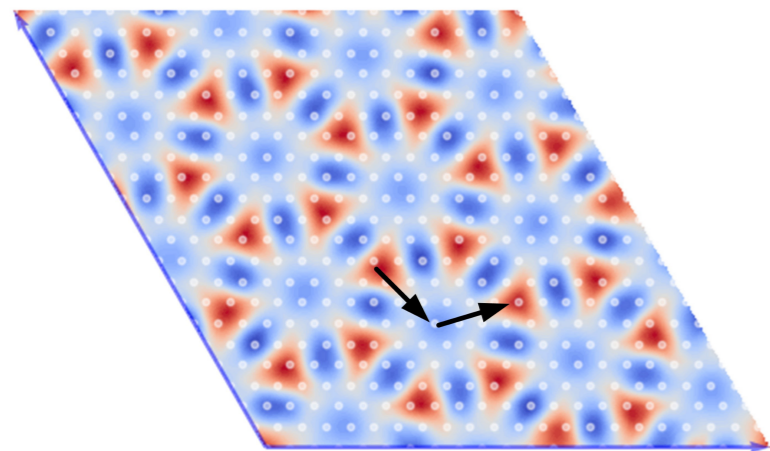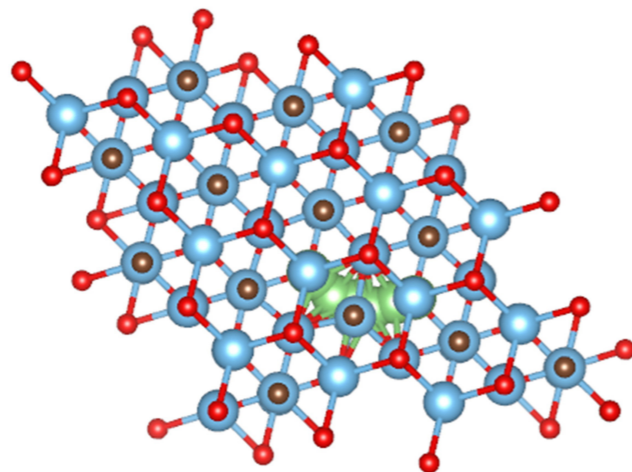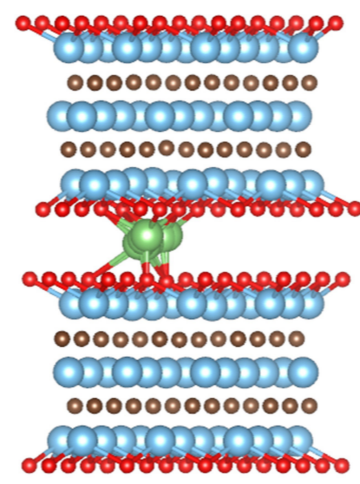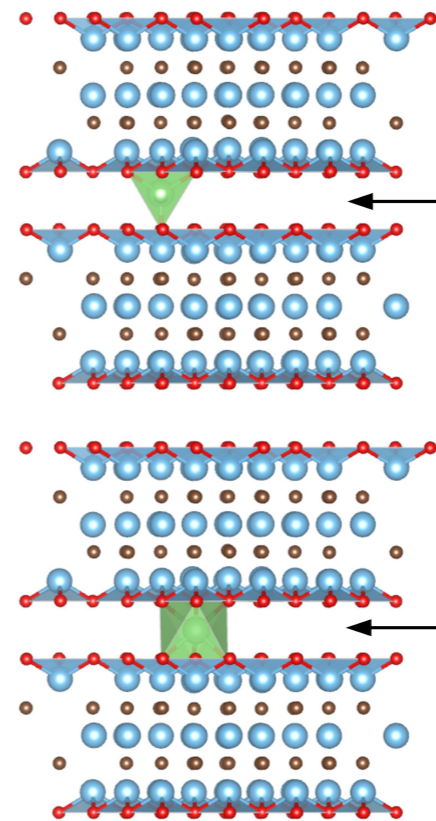

Initial state/Final state  
fourfold tetrahedral coordination

Saddle point  
sixfold octahedral coordination
