# Supplementary material
Source: Royal Society of Chemistry journal article supplement (doi:10.1039/d6nr01141a)

**p1**

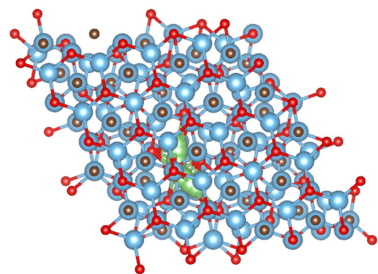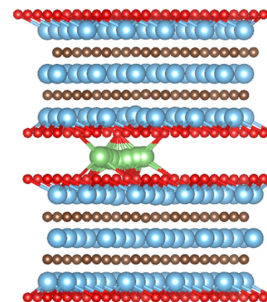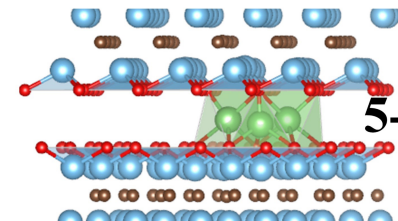

**5-fold → 4-fold → 5-fold**

**p2**

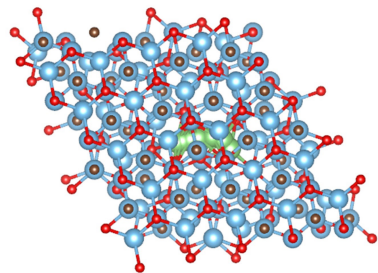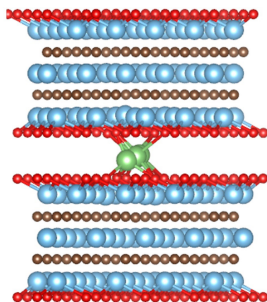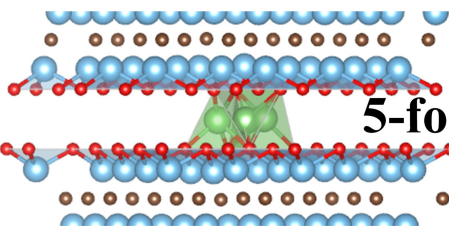

**5-fold → 4-fold → 5-fold**

**p3**

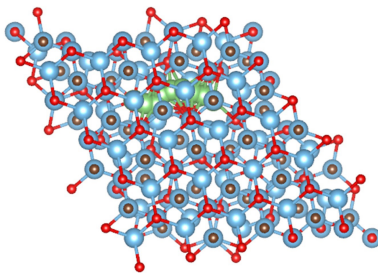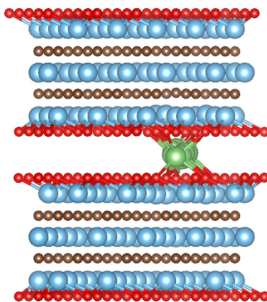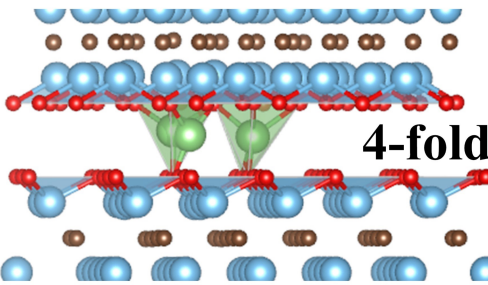

**4-fold → 3-fold → 5-fold**

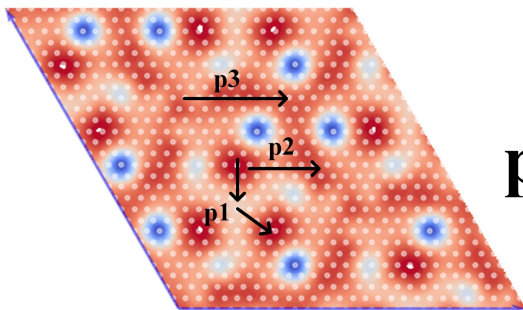

Supplement: d6nr01141a11.pdf [file d6nr01141a11.pdf]

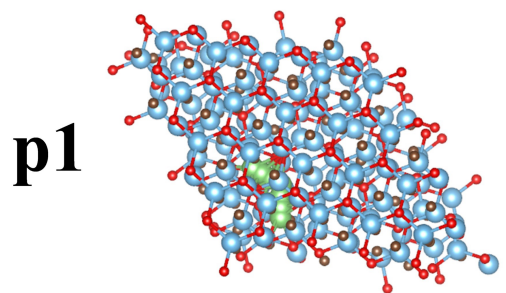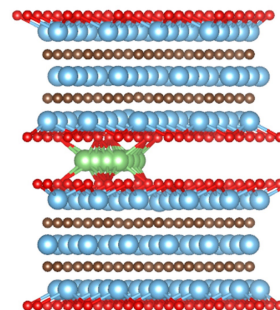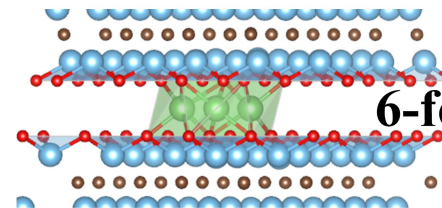

**6-fold → 6-fold → 6-fold**

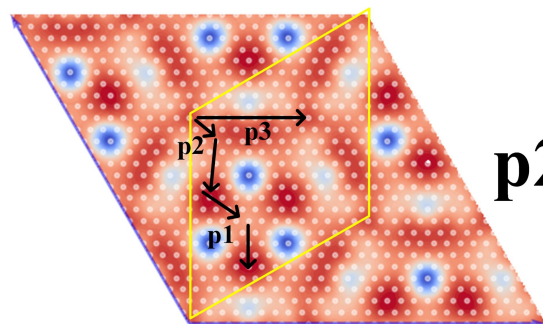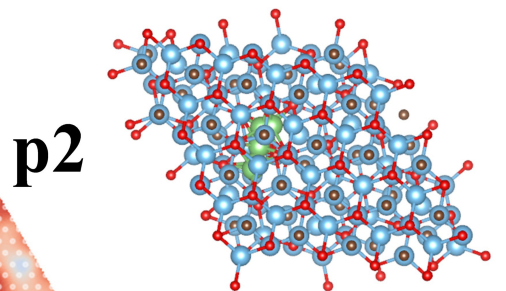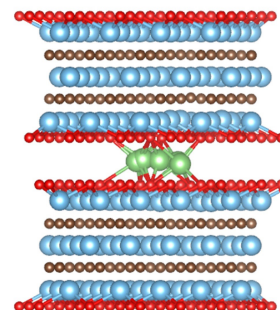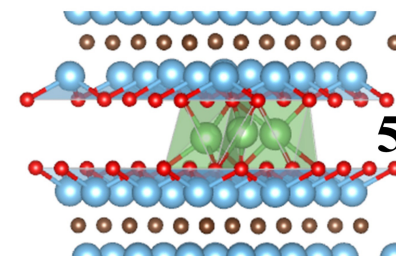

**5-fold → 3-fold → 6-fold**

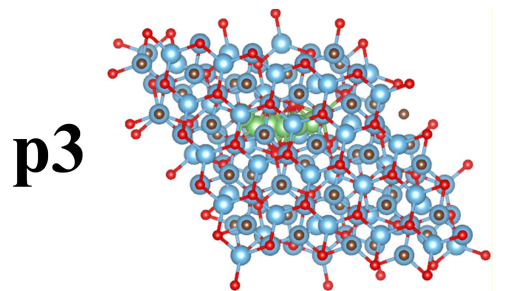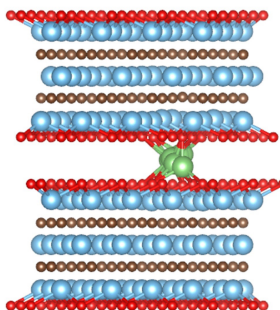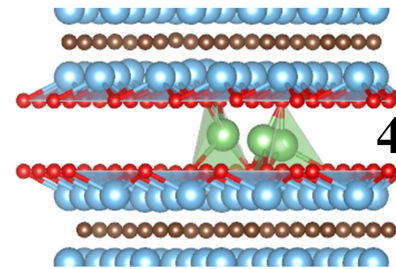

**4-fold → 3-fold → 4-fold**

Supplement: d6nr01141a12.pdf [file d6nr01141a12.pdf]

**p1**

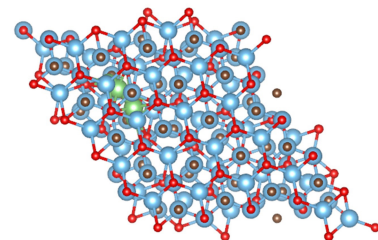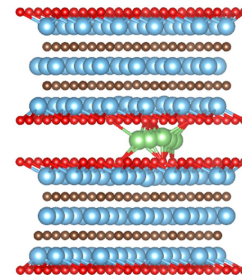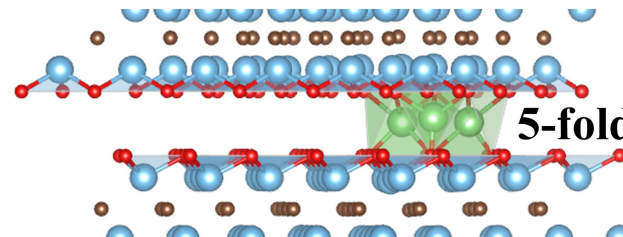

**5-fold → 4-fold → 5-fold**

**p2**

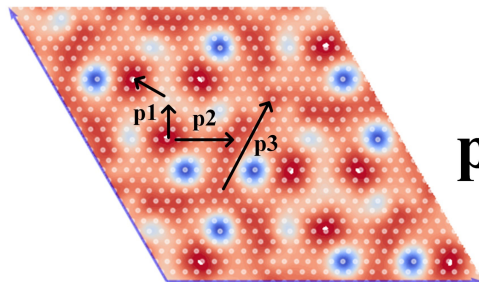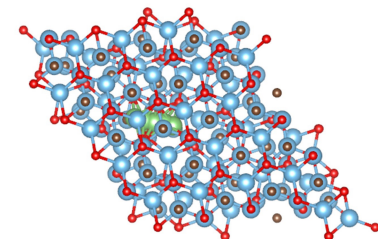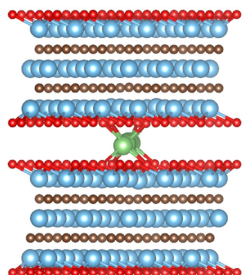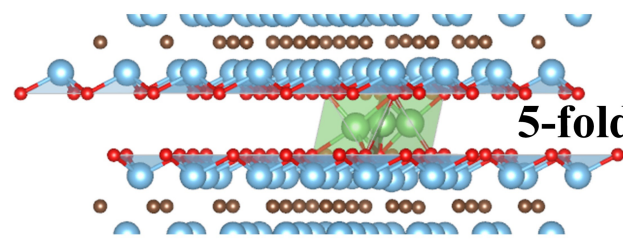

**5-fold → 4-fold → 5-fold**

**p3**

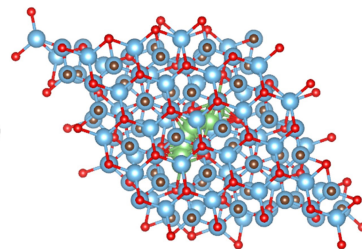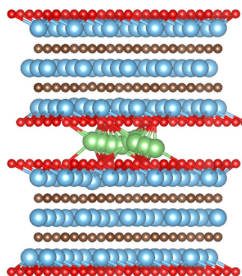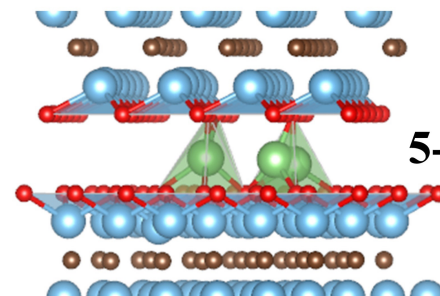

**5-fold → 3-fold → 4-fold**

Supplement: d6nr01141a14.pdf [file d6nr01141a14.pdf]

**p1**

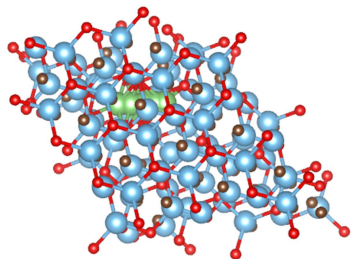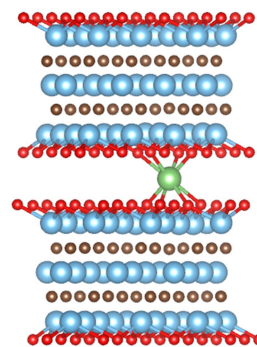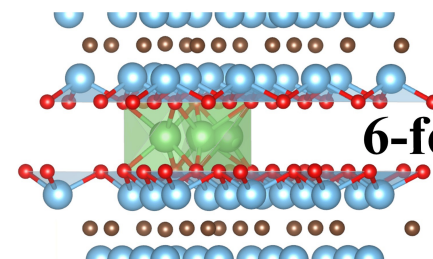

**6-fold → 6-fold → 4-fold**

**p2**

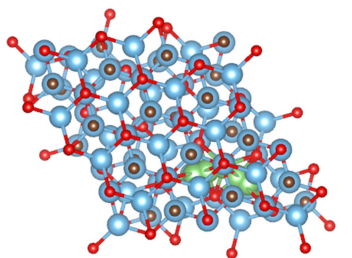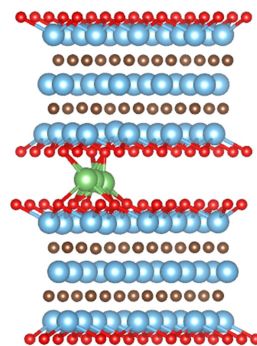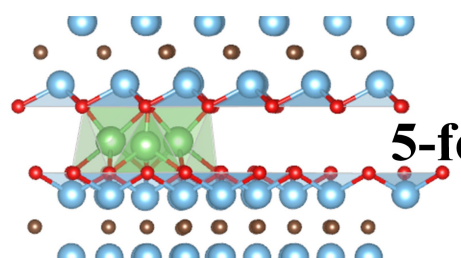

**5-fold → 4-fold → 5-fold**

**p3**

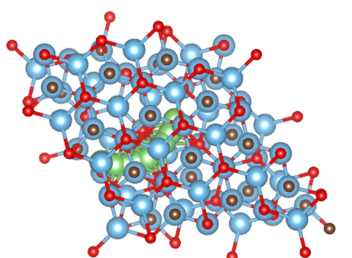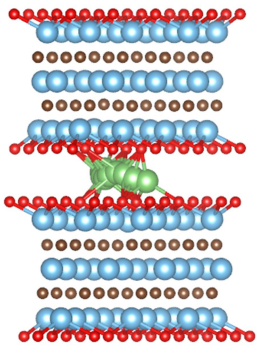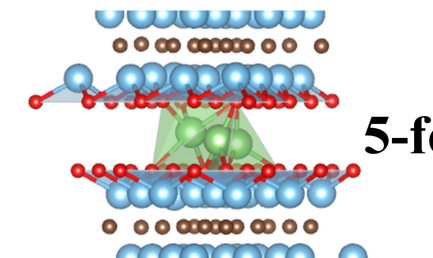

**5-fold → 3-fold → 4-fold**

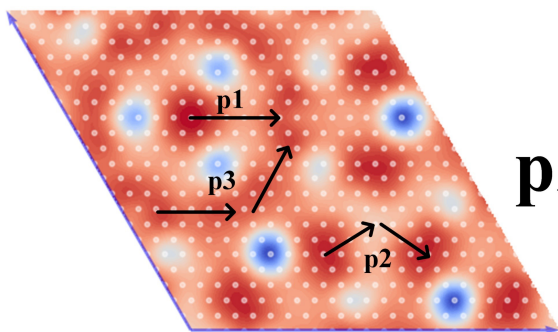

Supplement: d6nr01141a15.pdf [file d6nr01141a15.pdf]

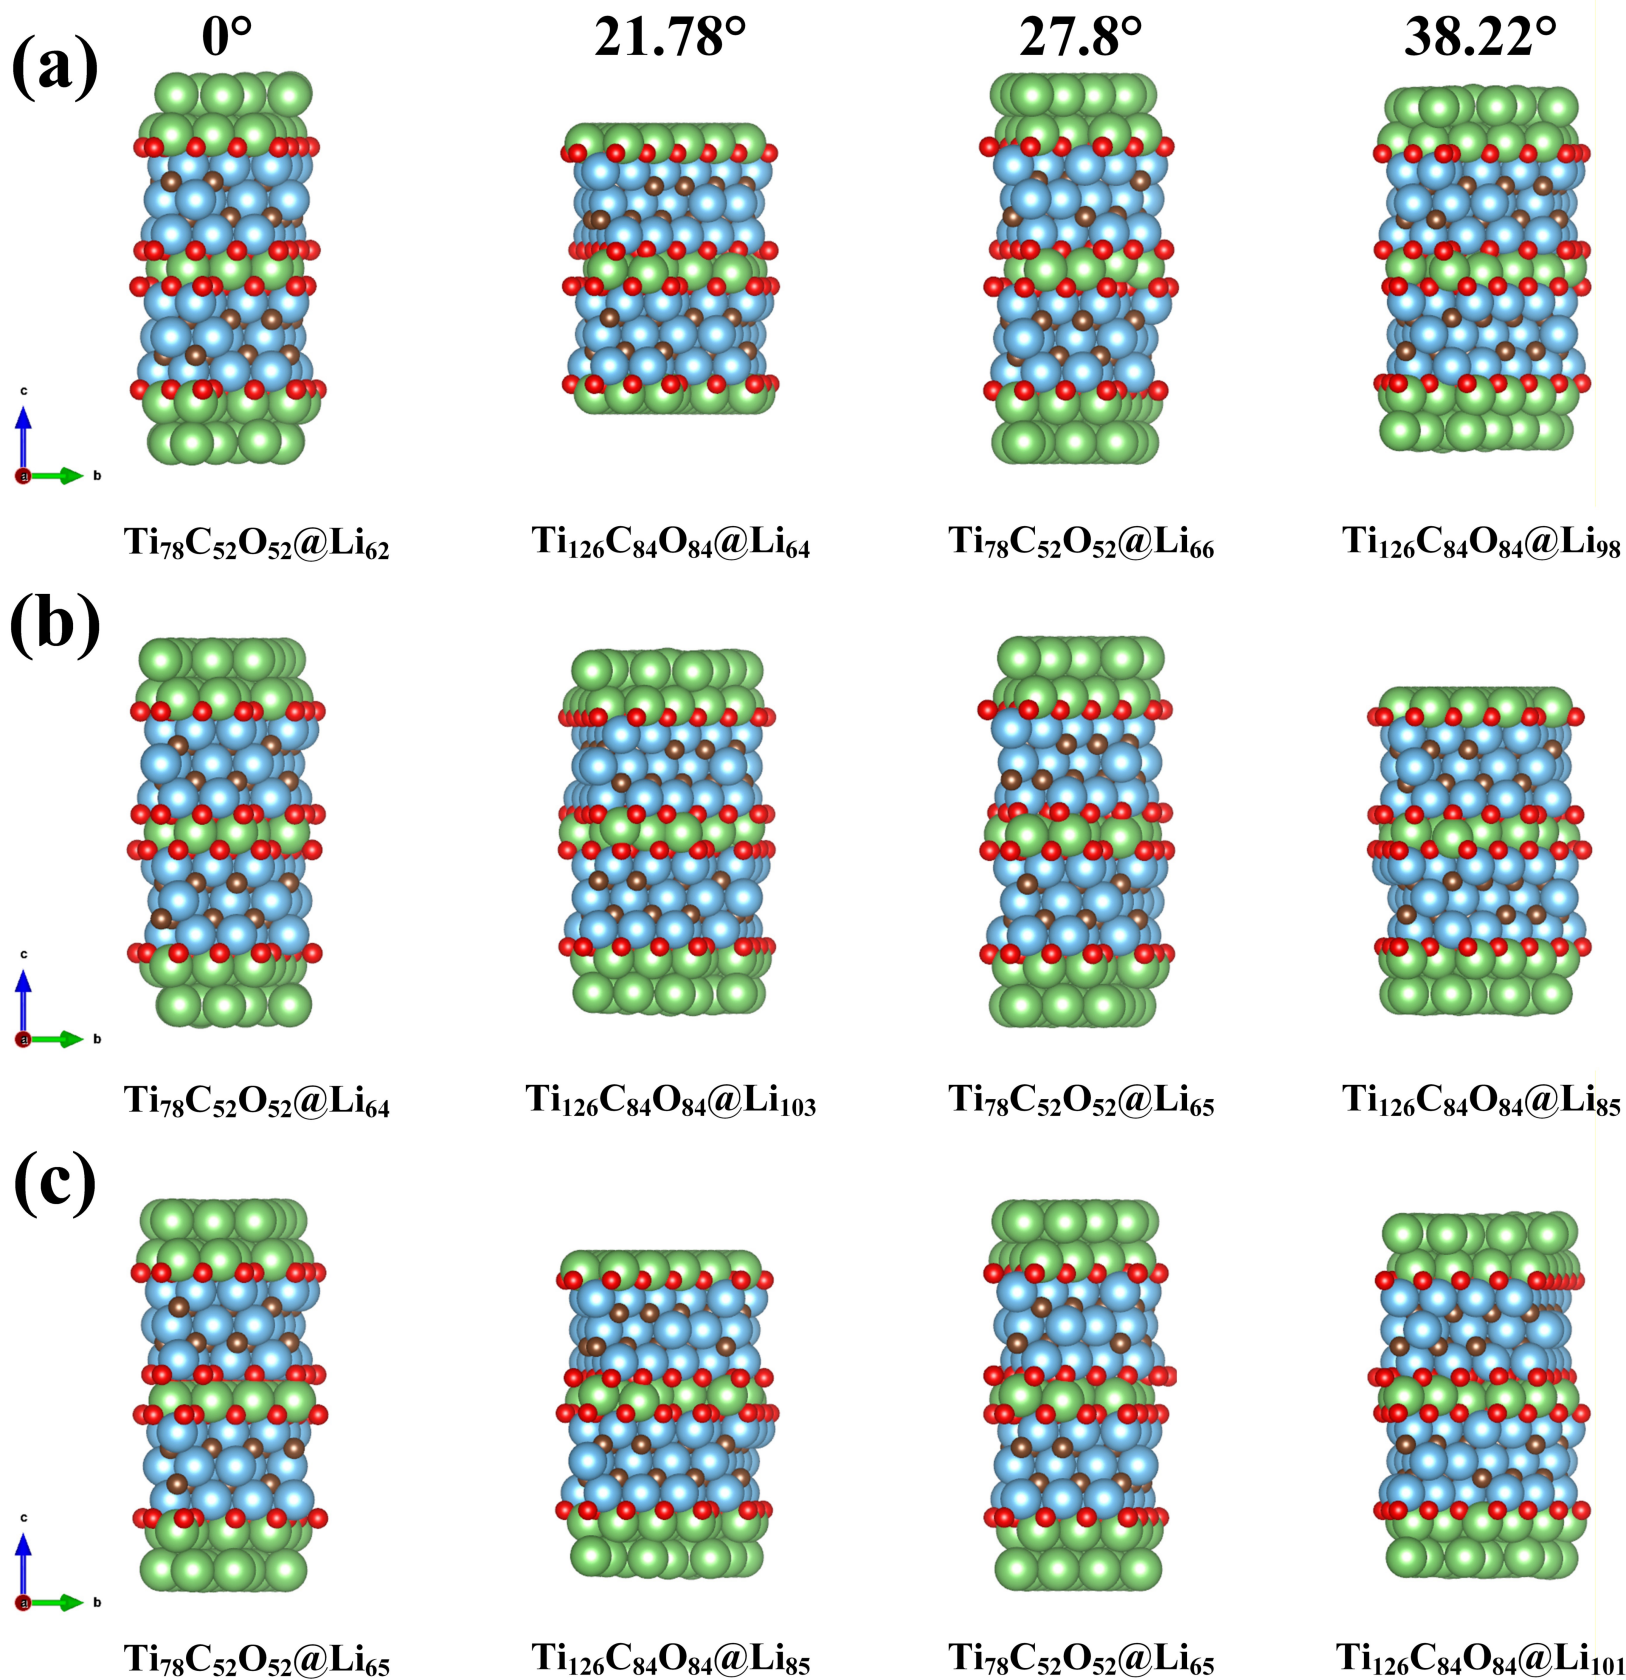

Supplement: d6nr01141a16.pdf [file d6nr01141a16.pdf]

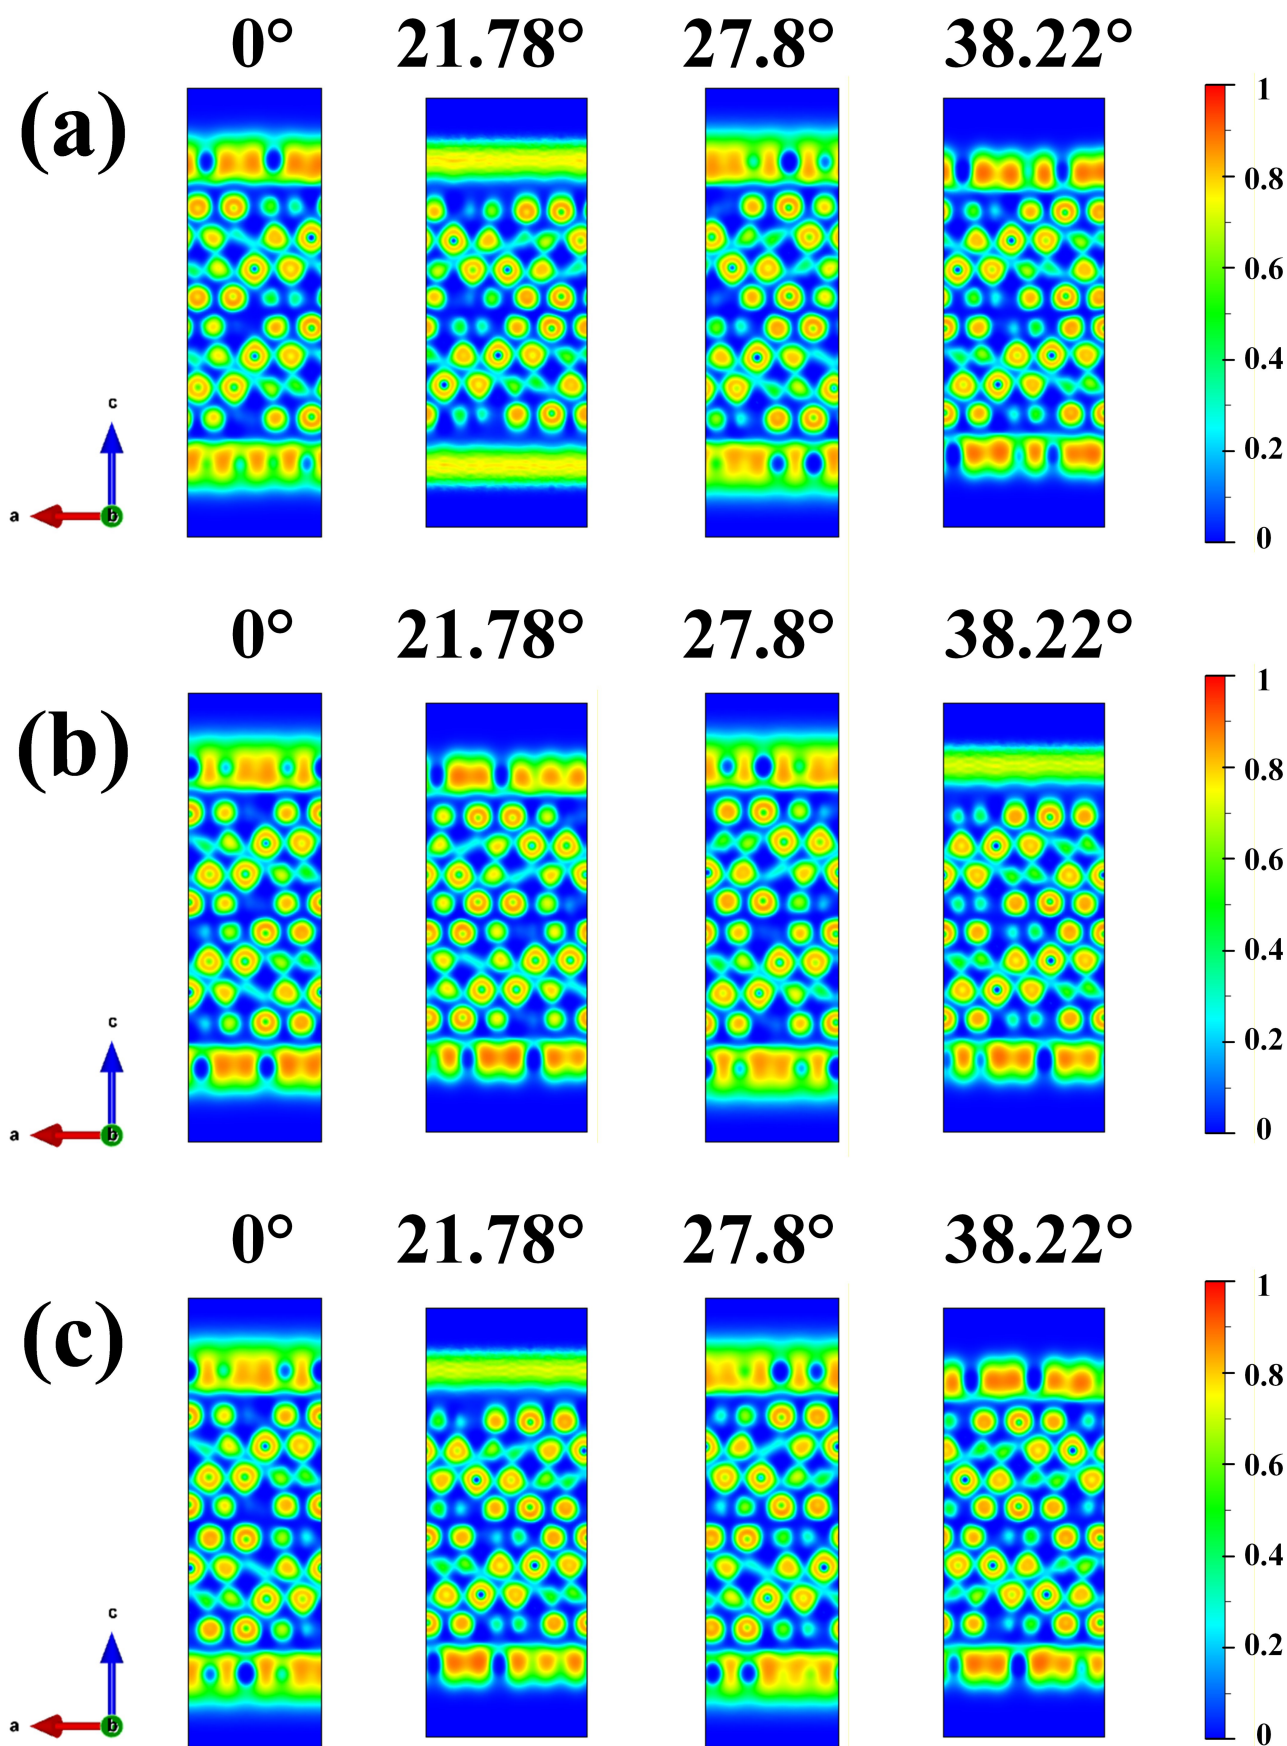

Supplement: d6nr01141a18.pdf [file d6nr01141a18.pdf]

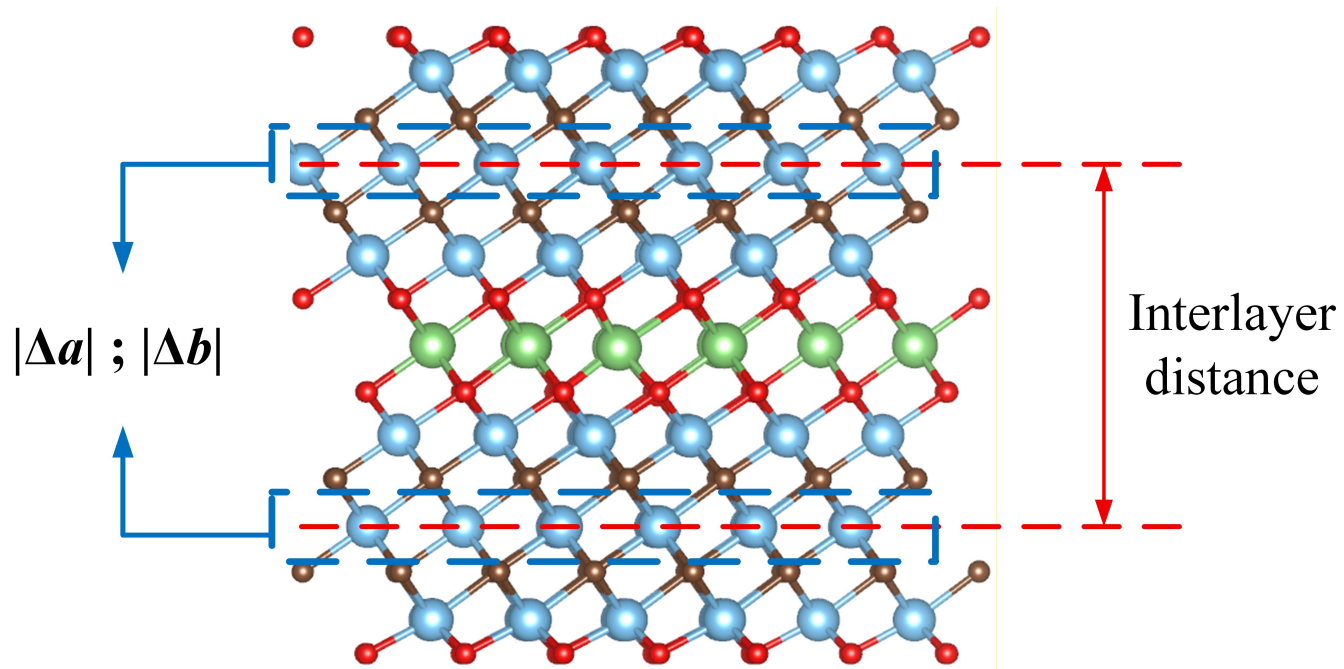

Supplement: d6nr01141a19.pdf [file d6nr01141a19.pdf]

**(a)**

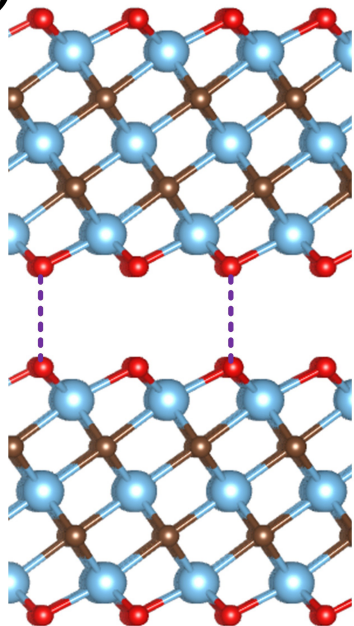

**(b)**

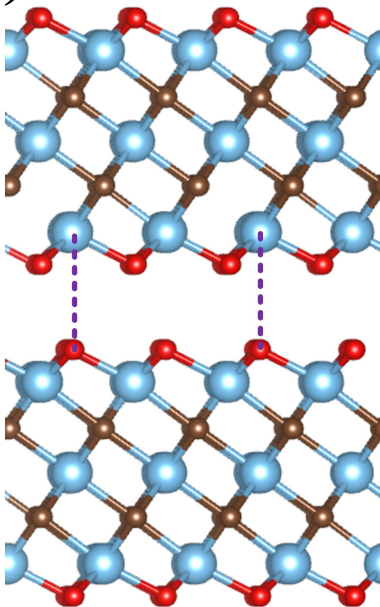

**(c)**

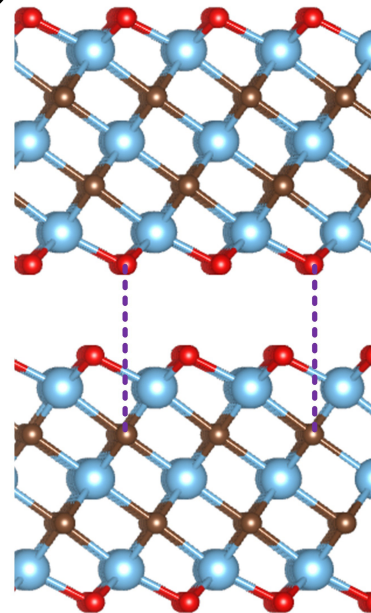

Supplement: d6nr01141a2.pdf [file d6nr01141a2.pdf]

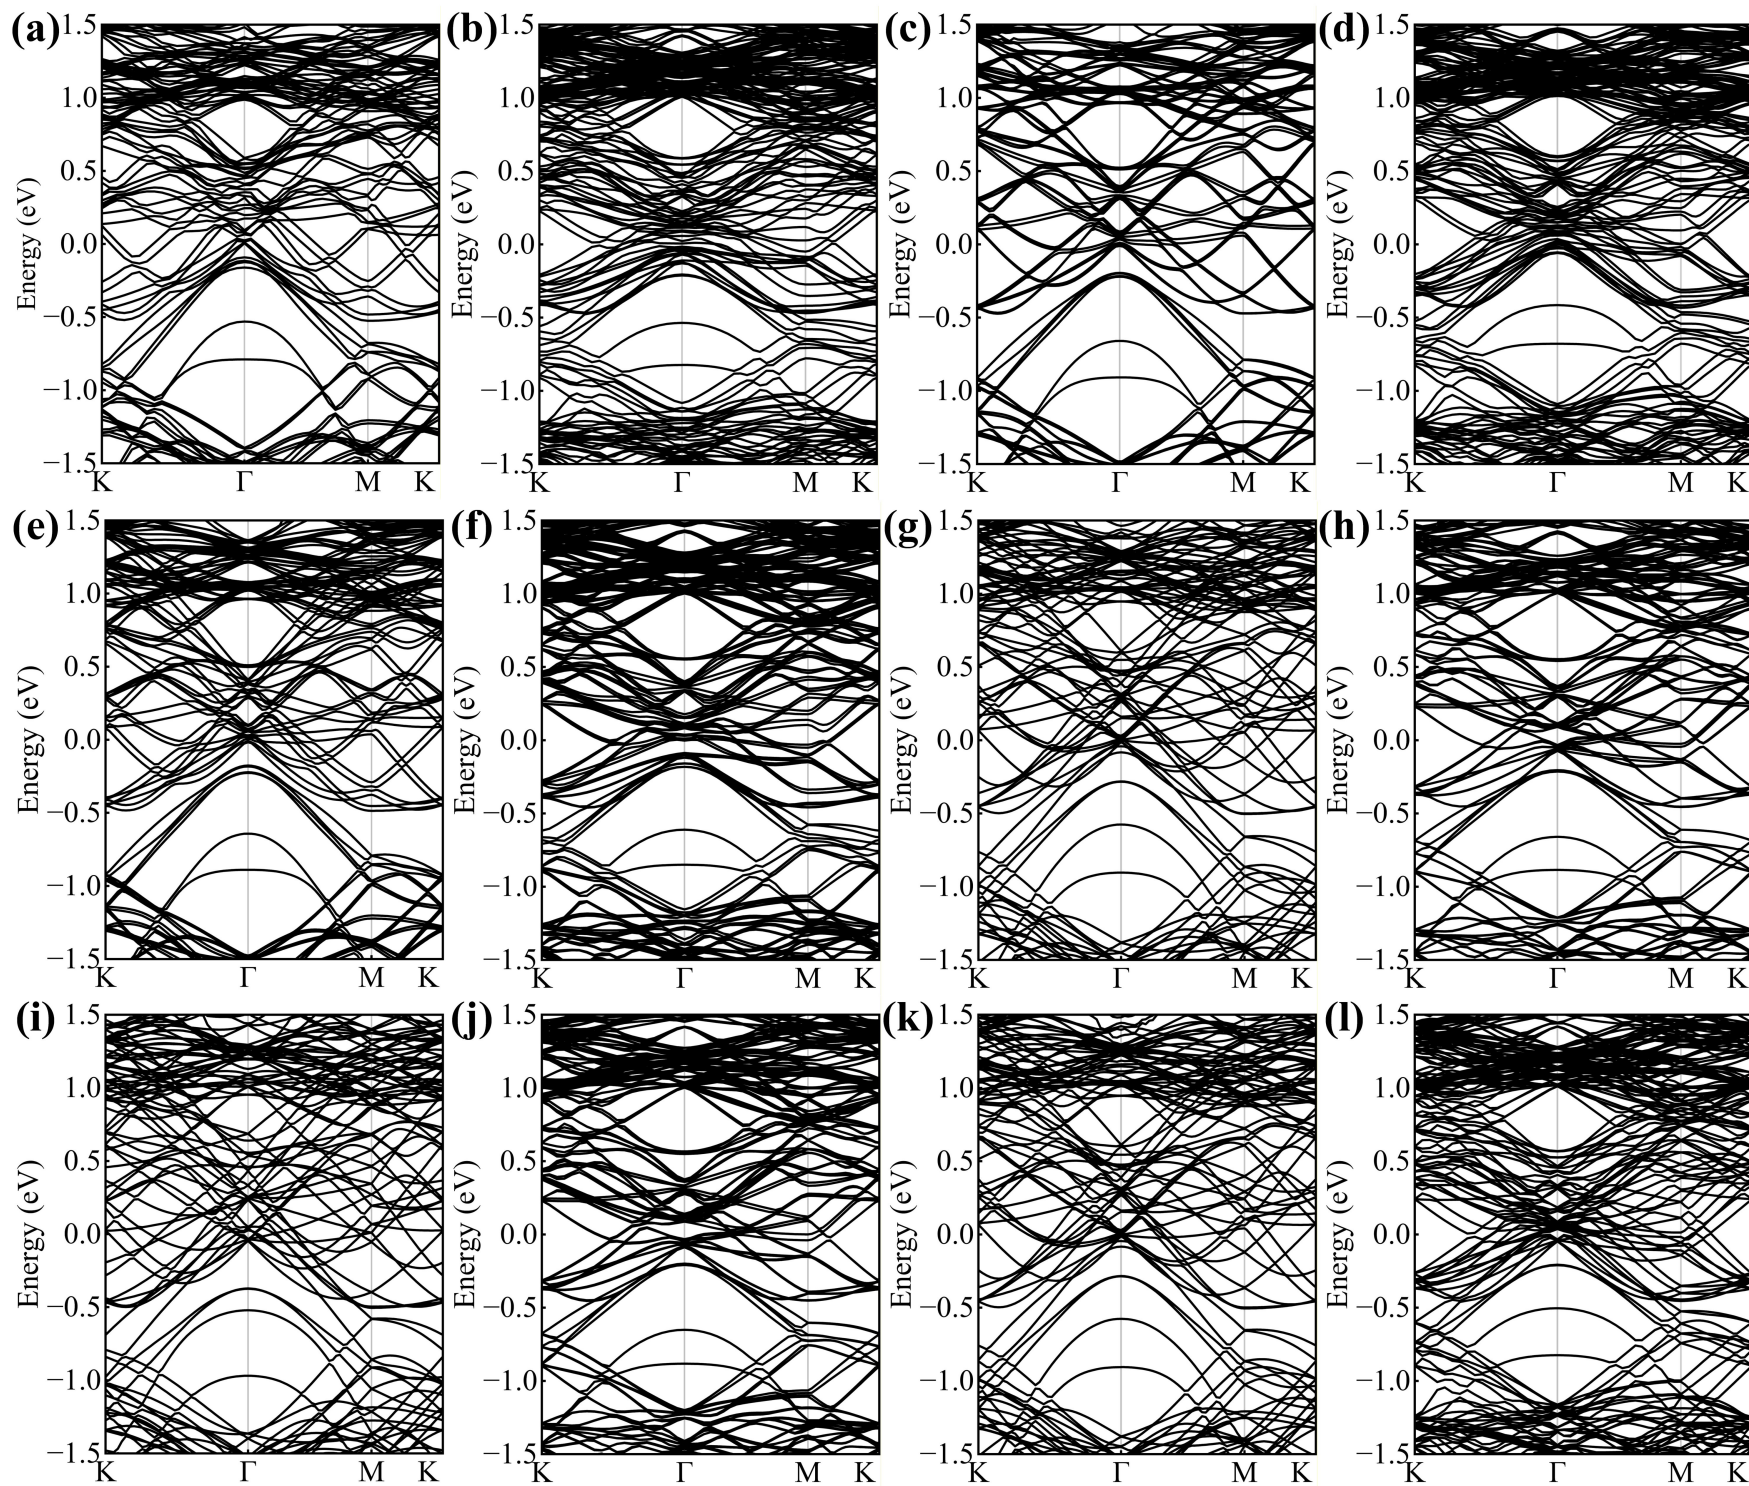

Supplement: d6nr01141a20.pdf [file d6nr01141a20.pdf]

**(a)**

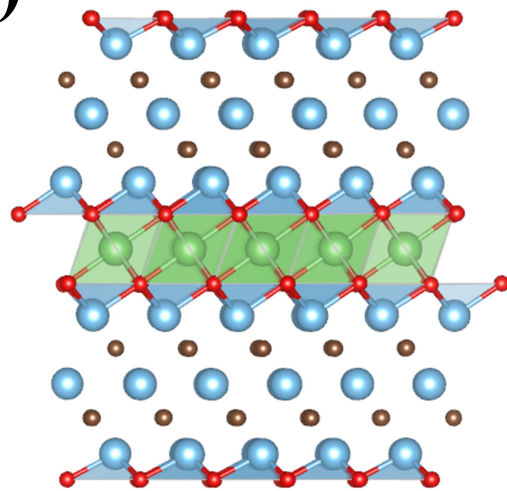

**(b)**

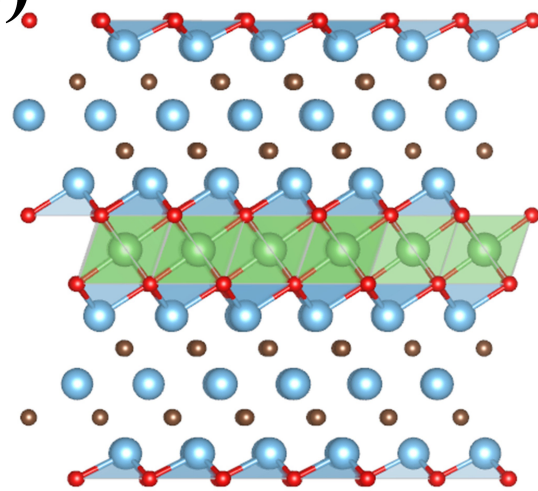

**(c)**

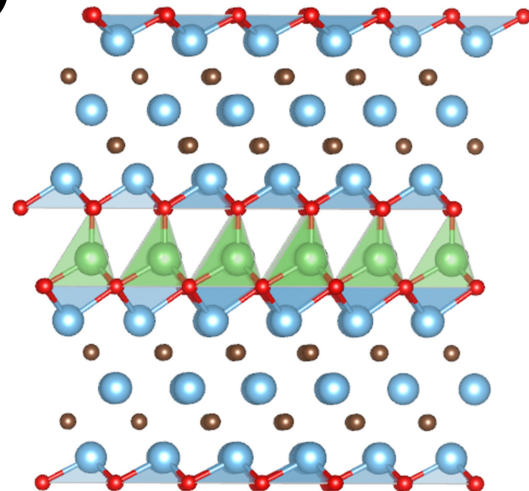

Supplement: d6nr01141a21.pdf [file d6nr01141a21.pdf]

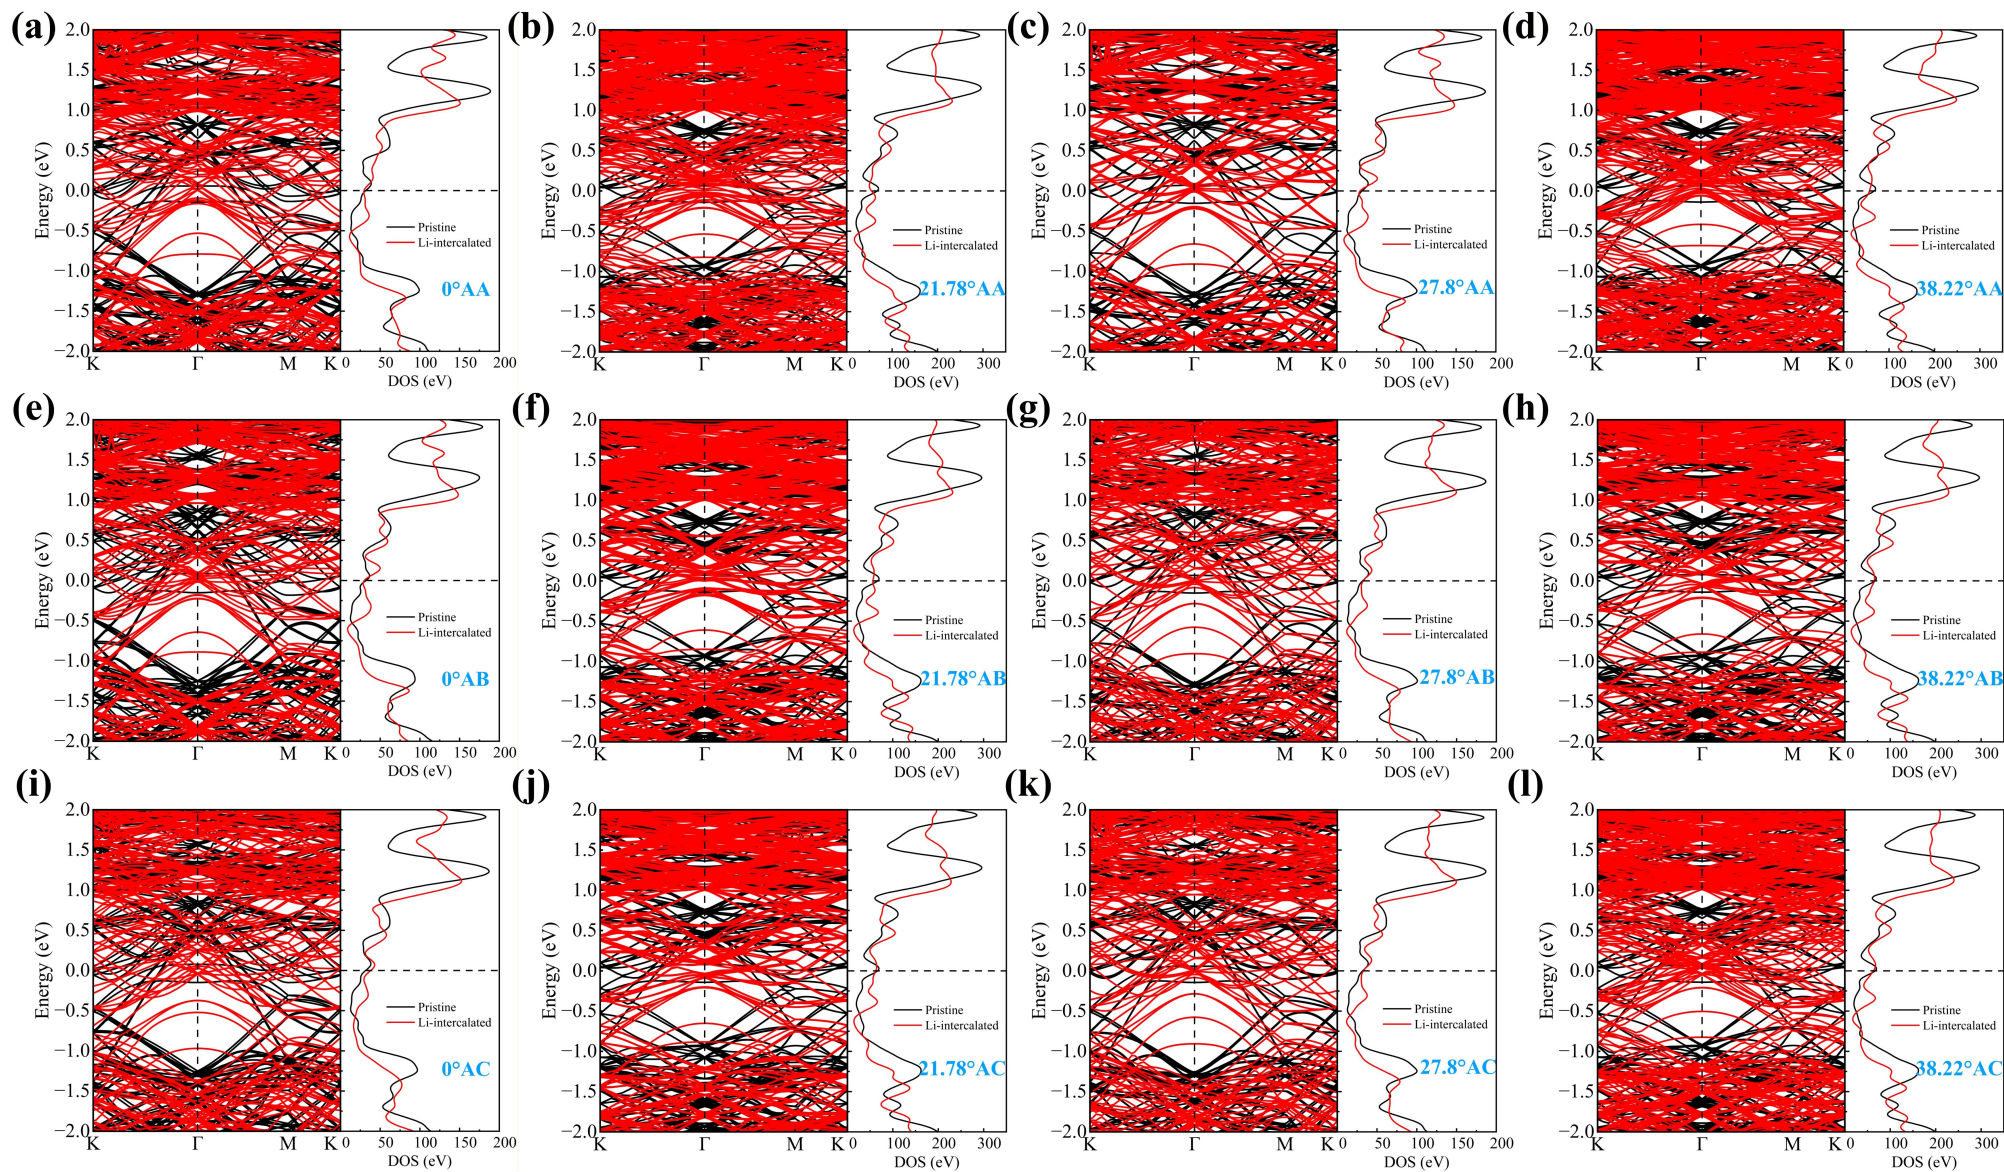

Supplement: d6nr01141a22.pdf [file d6nr01141a22.pdf]

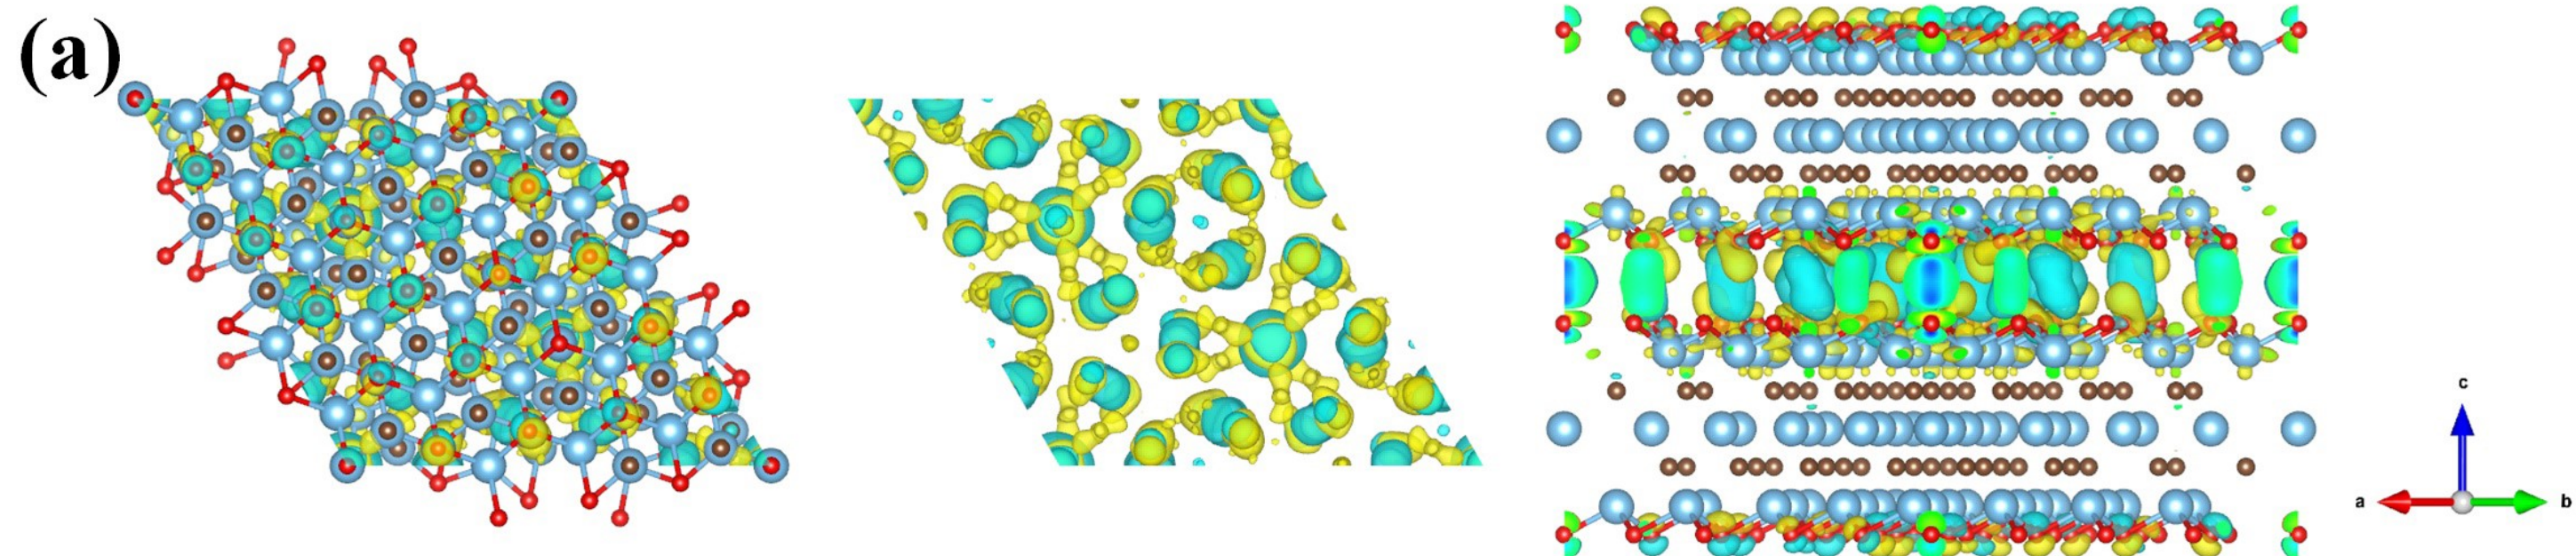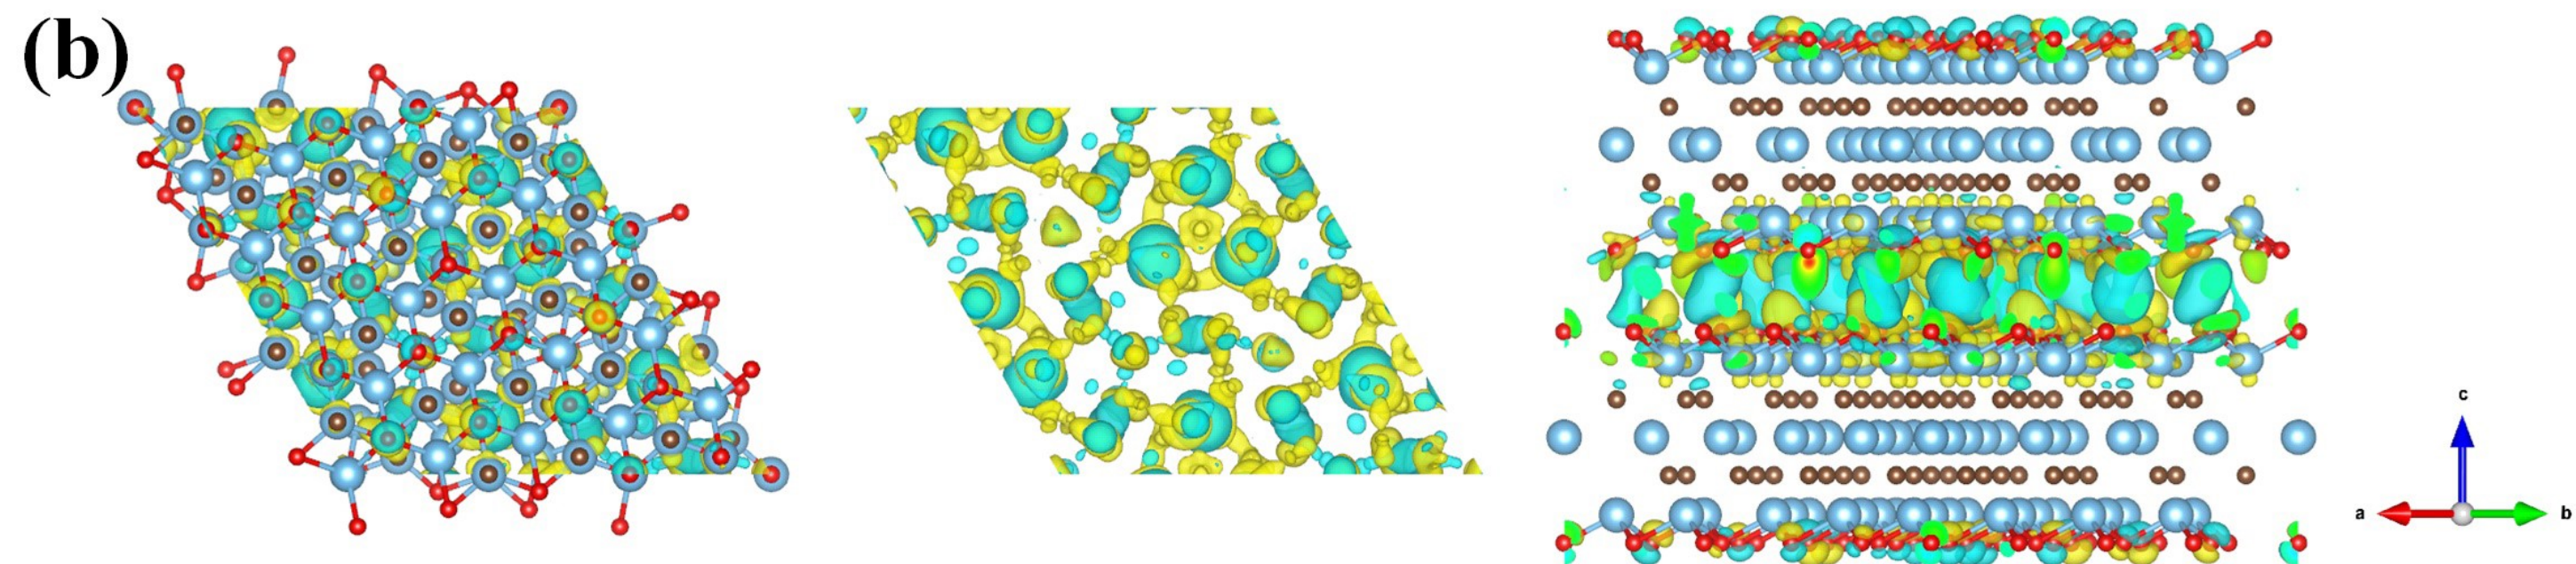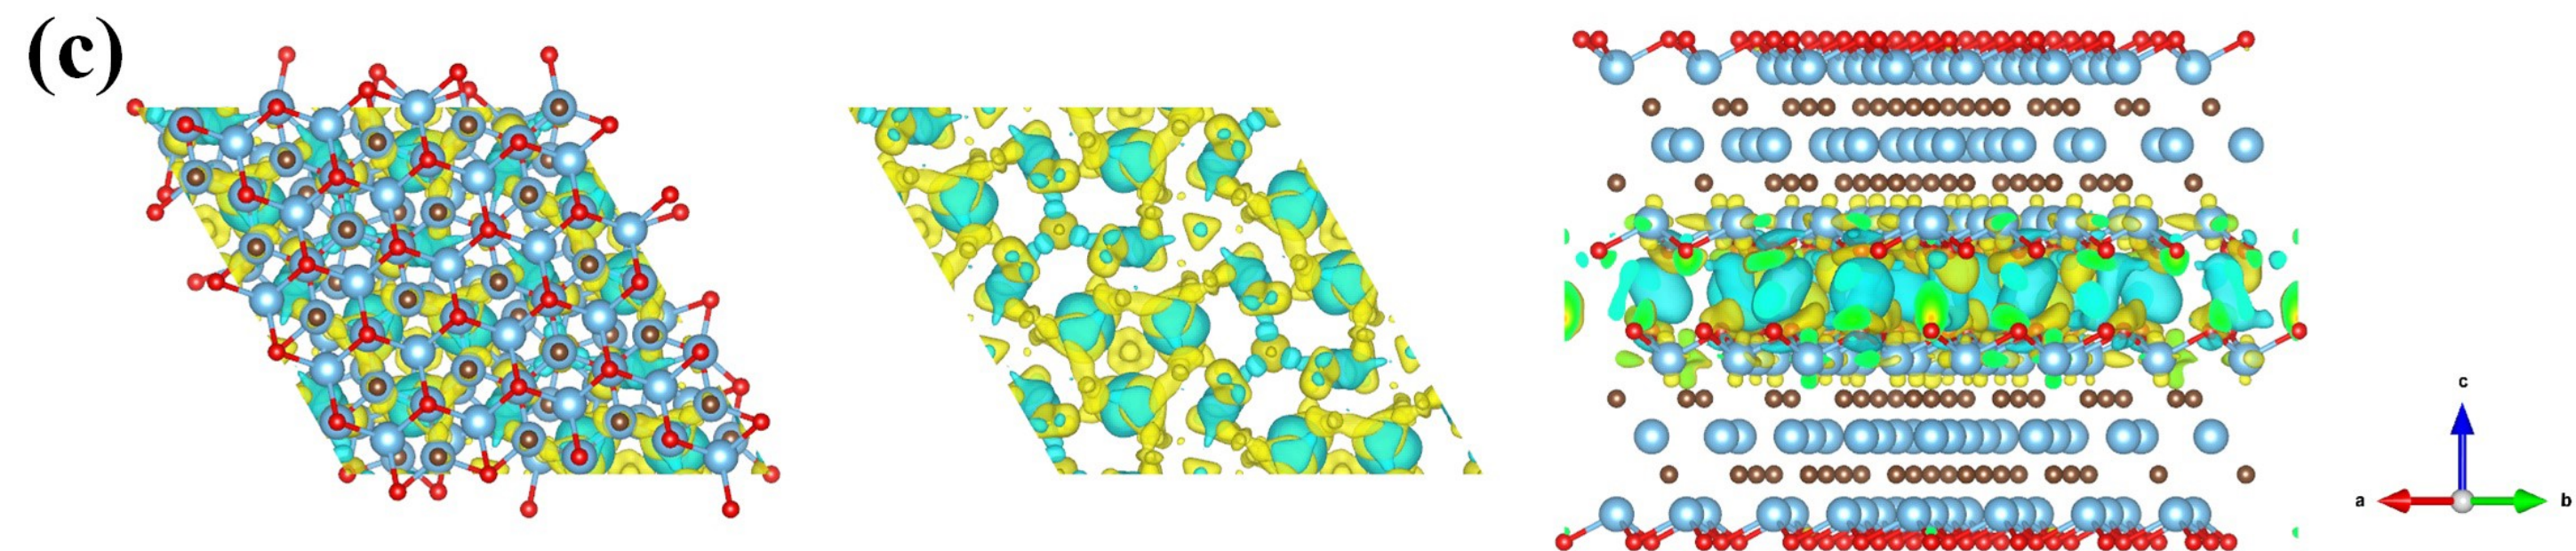

Supplement: d6nr01141a24.pdf [file d6nr01141a24.pdf]

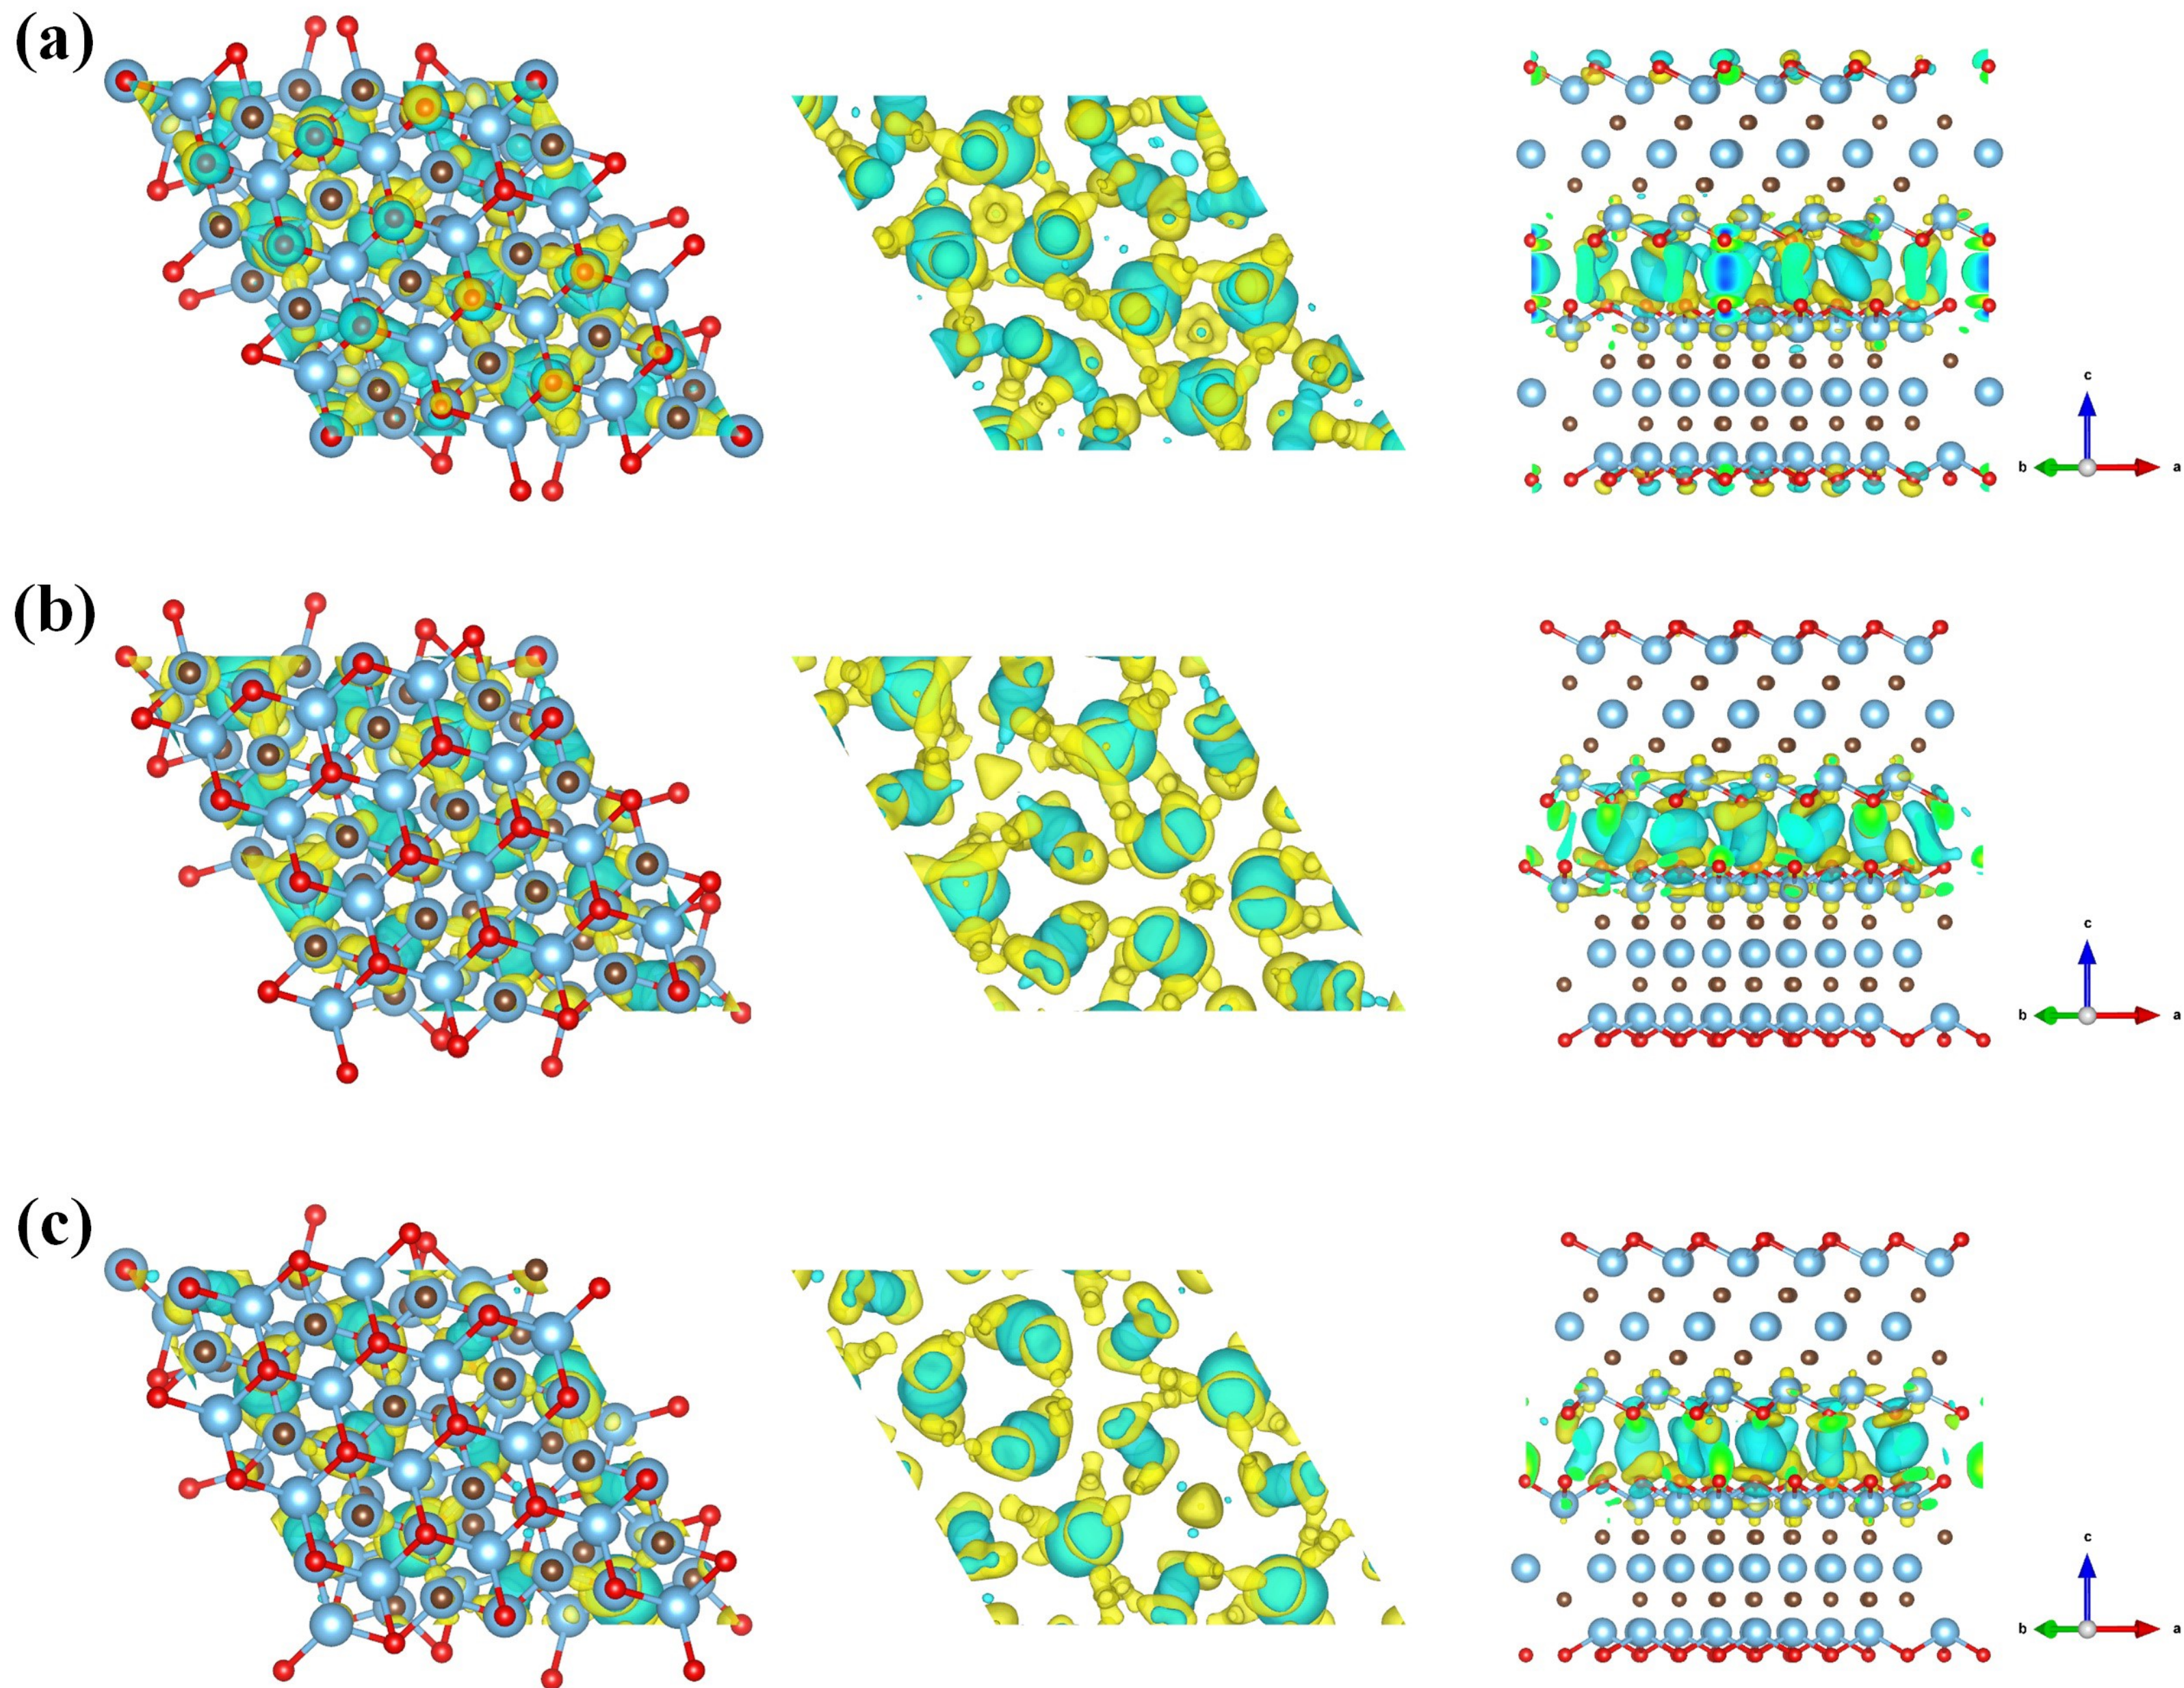

Supplement: d6nr01141a25.pdf [file d6nr01141a25.pdf]

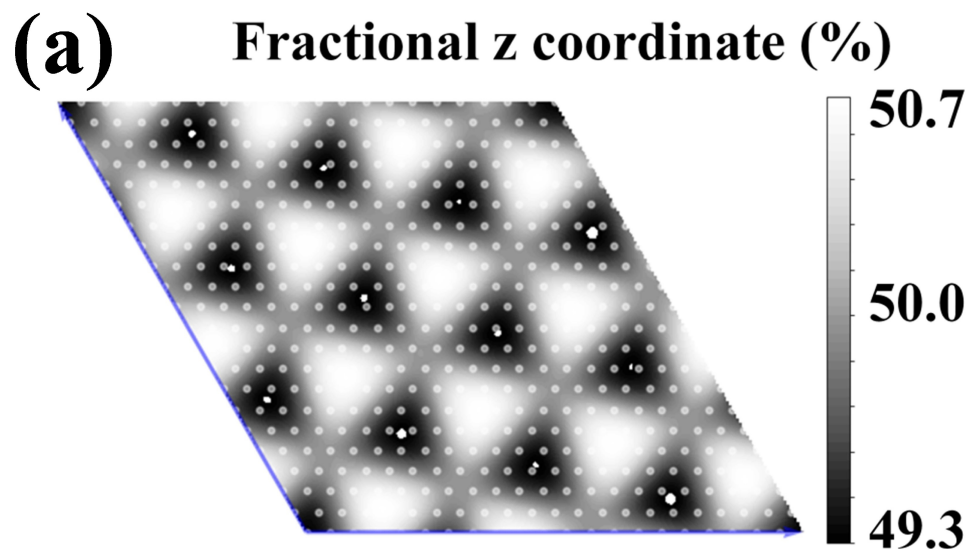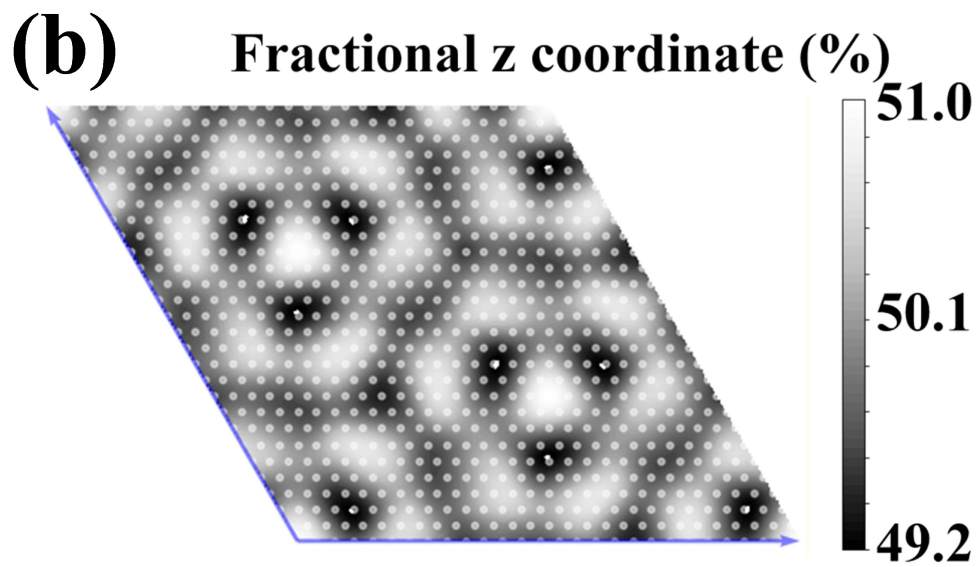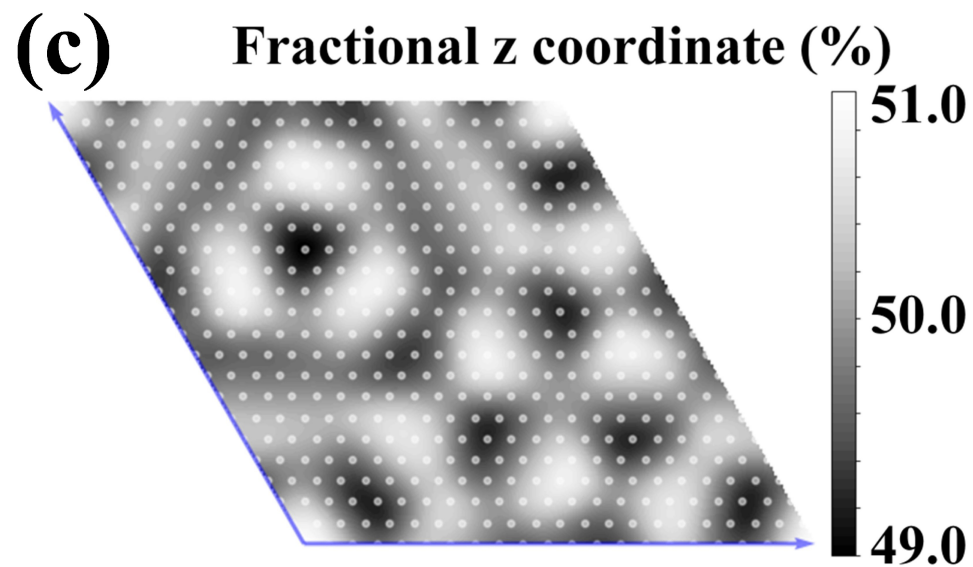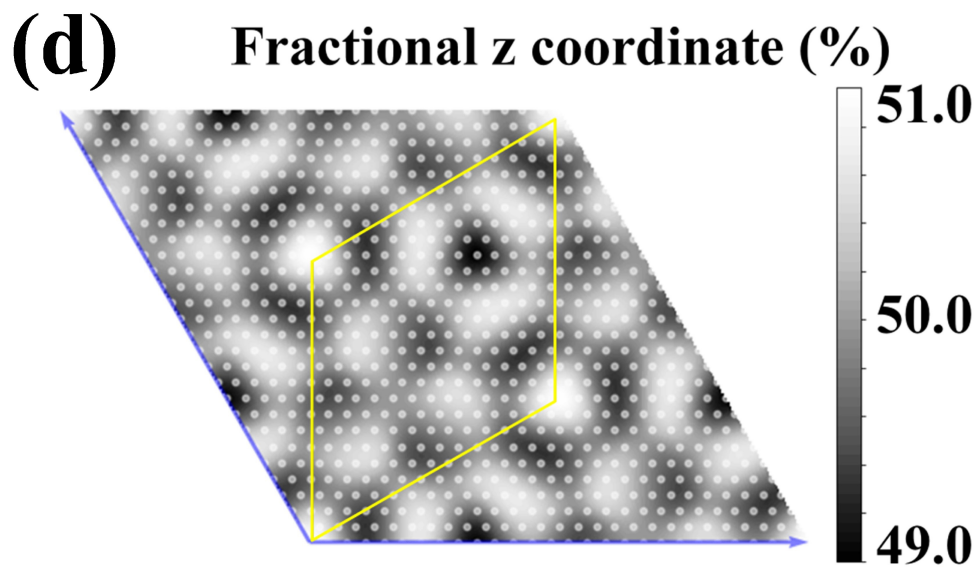

Supplement: d6nr01141a27.pdf [file d6nr01141a27.pdf]

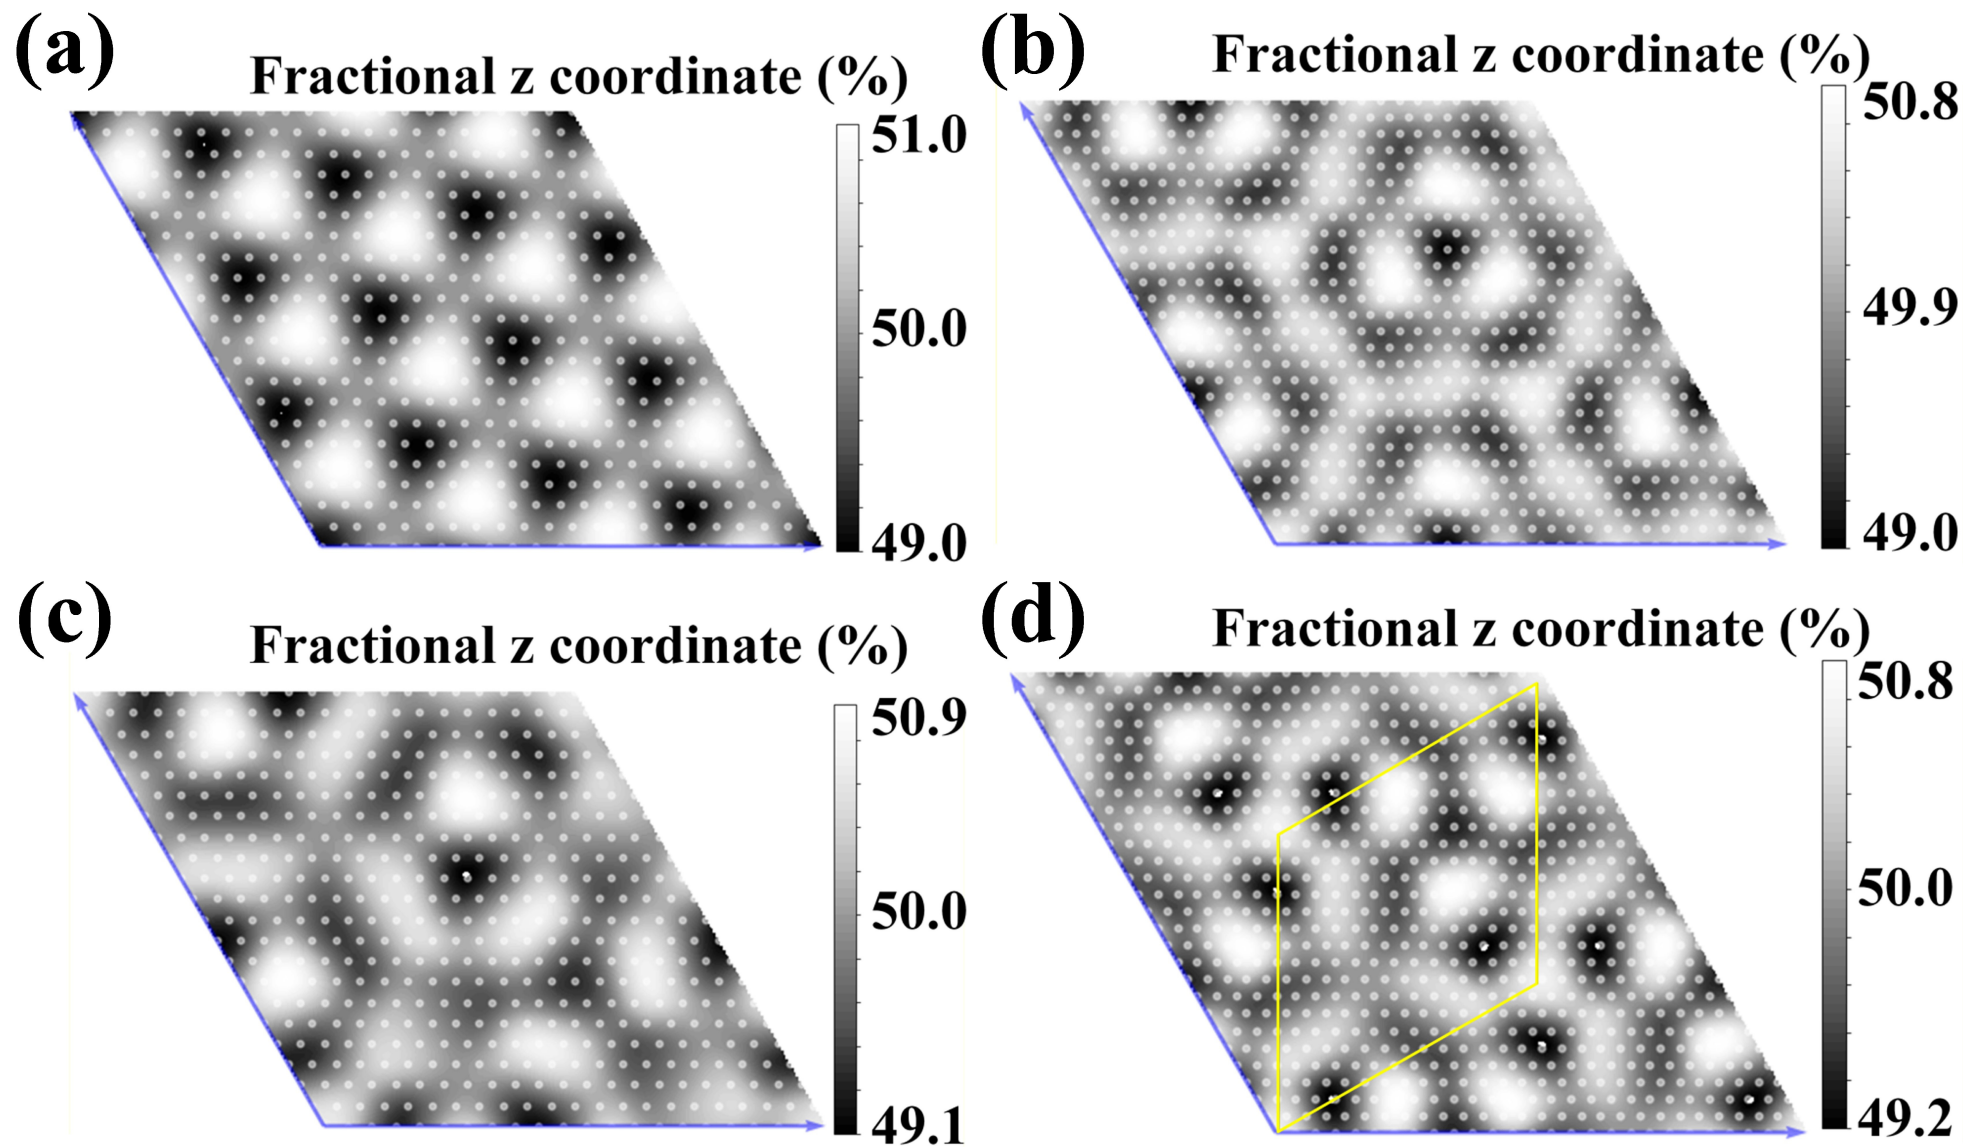

Supplement: d6nr01141a28.pdf [file d6nr01141a28.pdf]

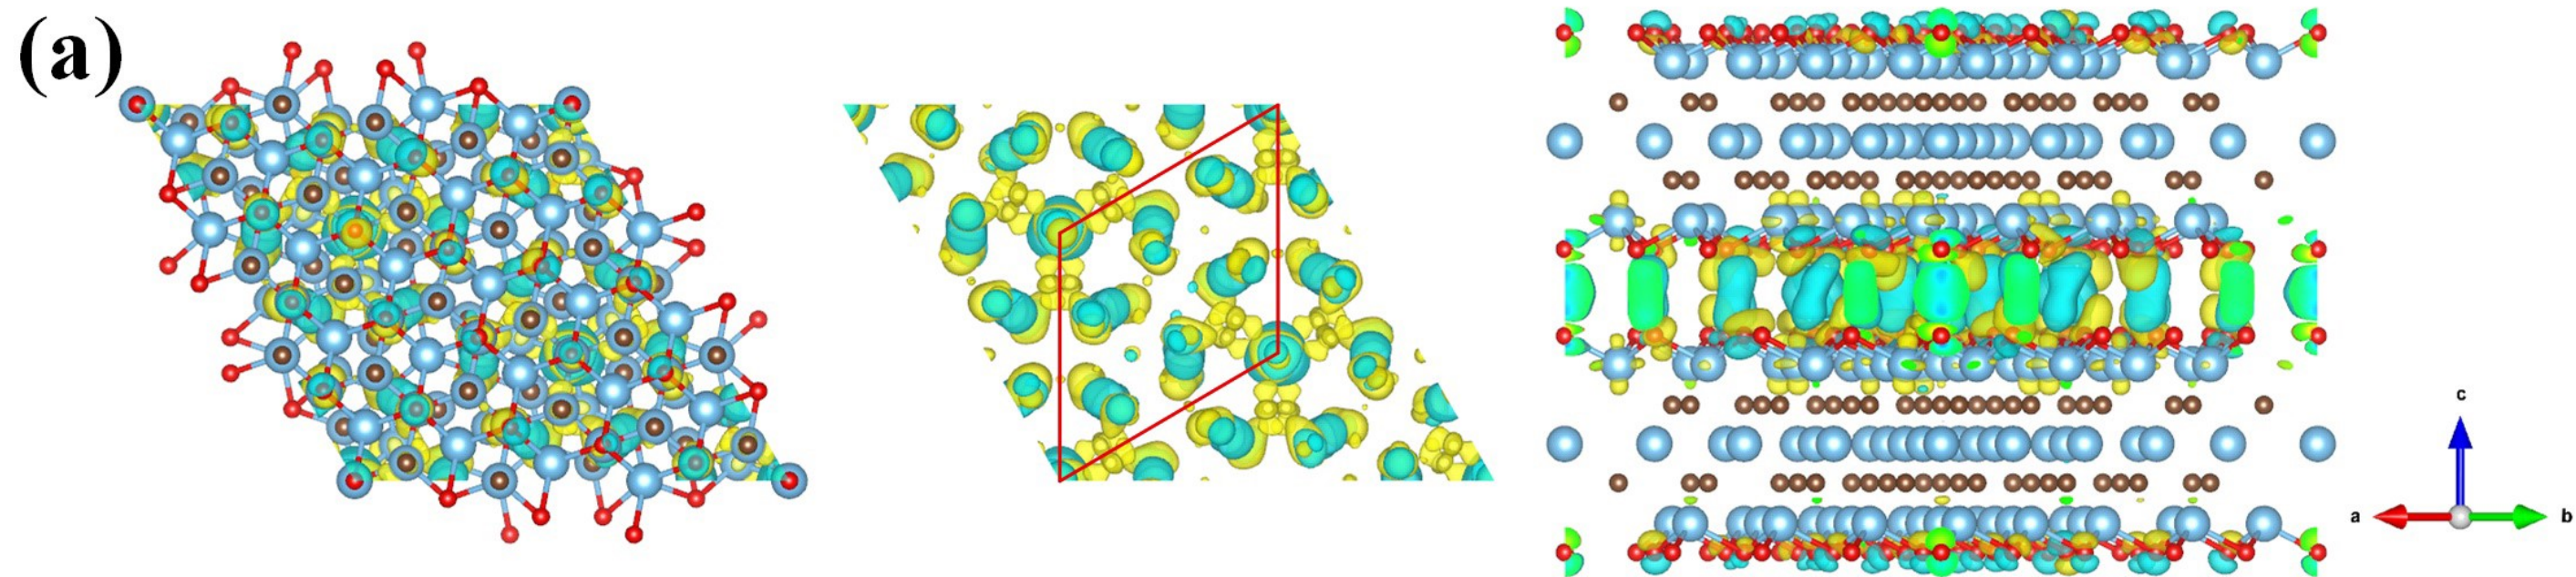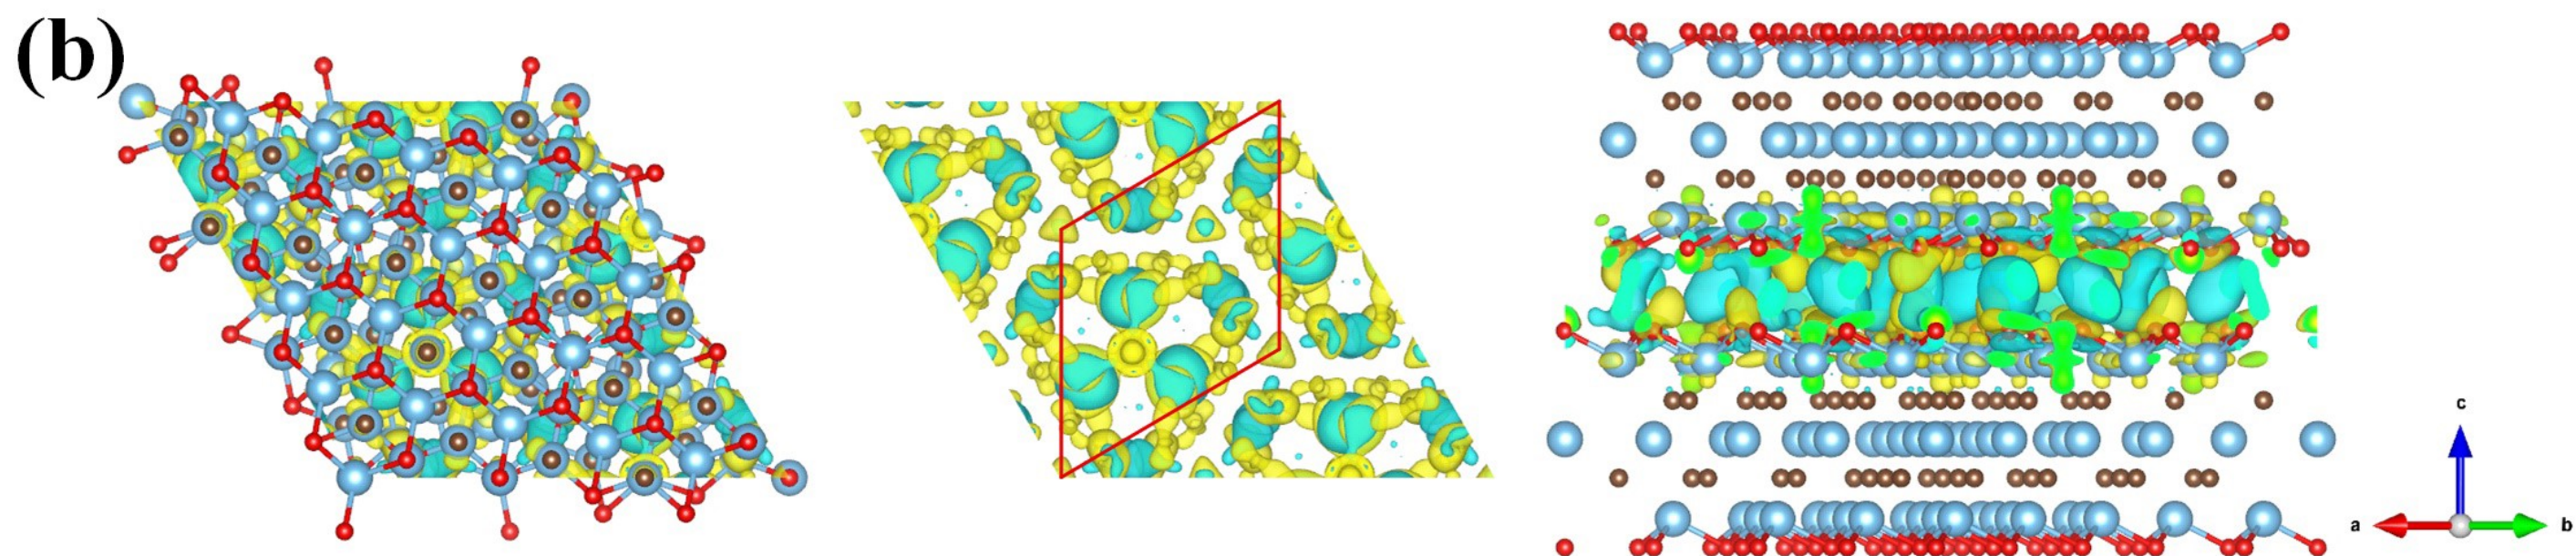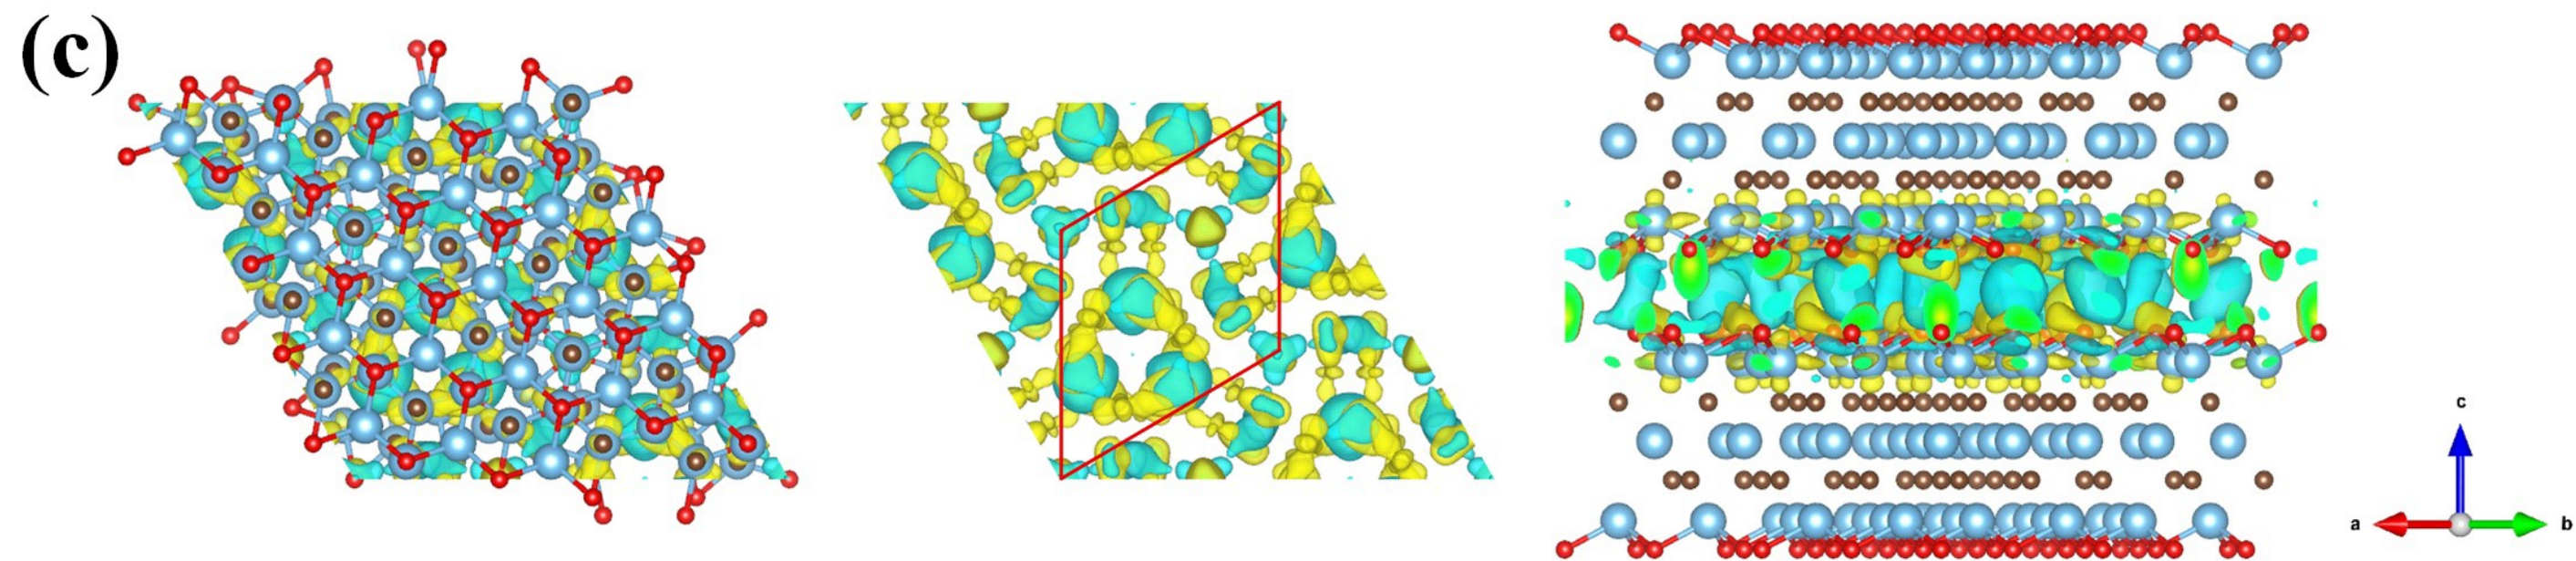

Supplement: d6nr01141a3.pdf [file d6nr01141a3.pdf]

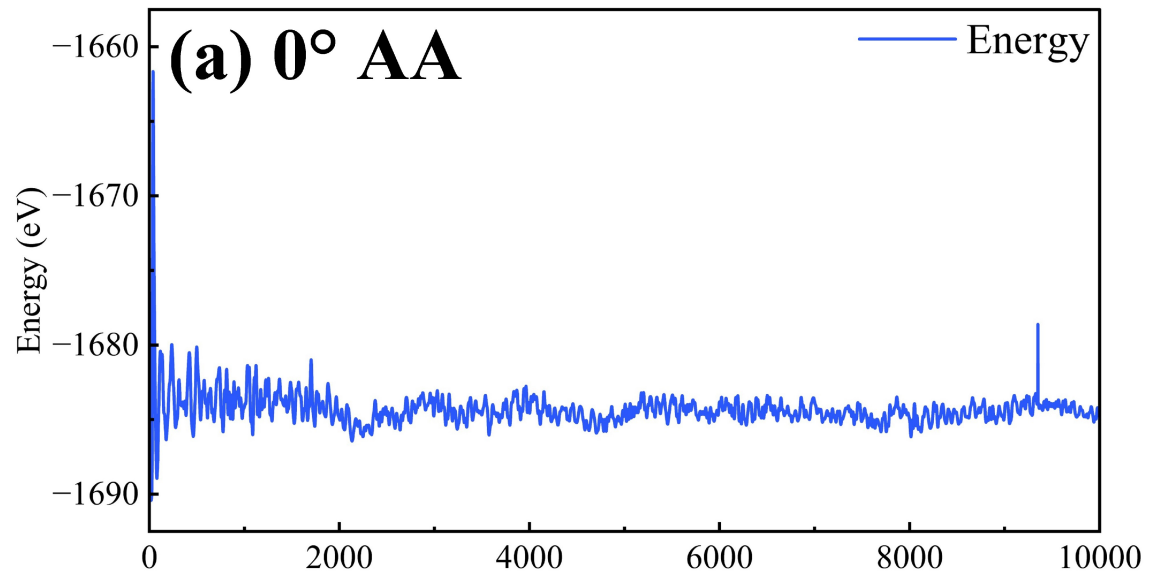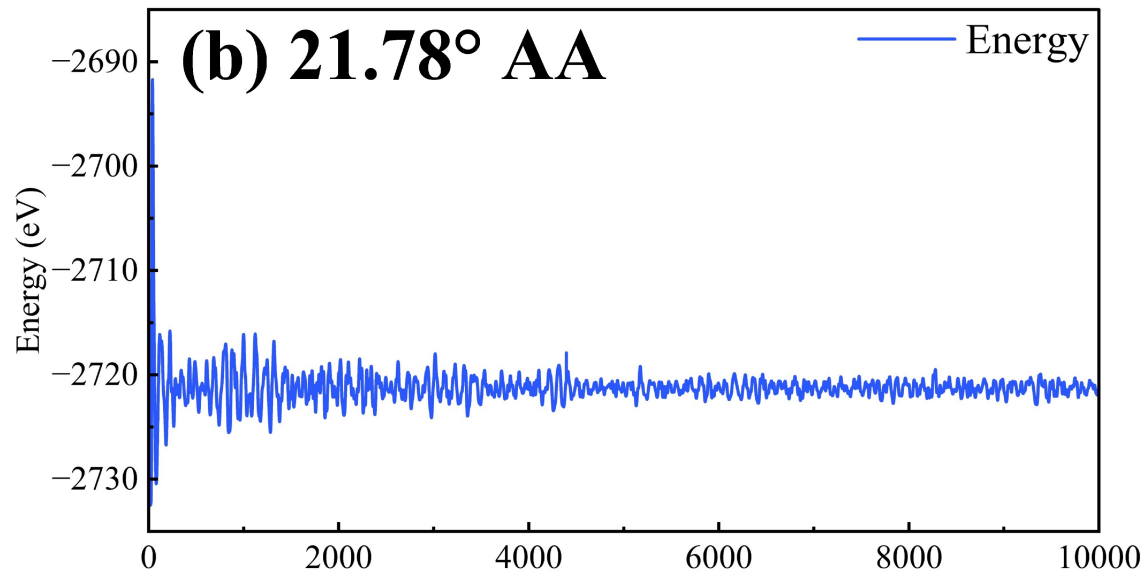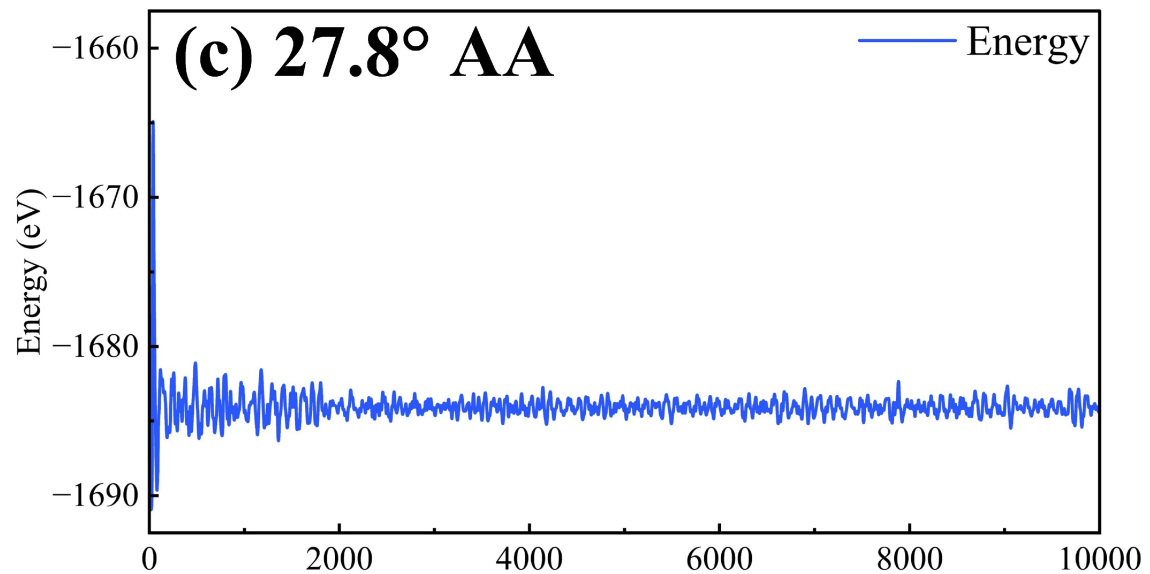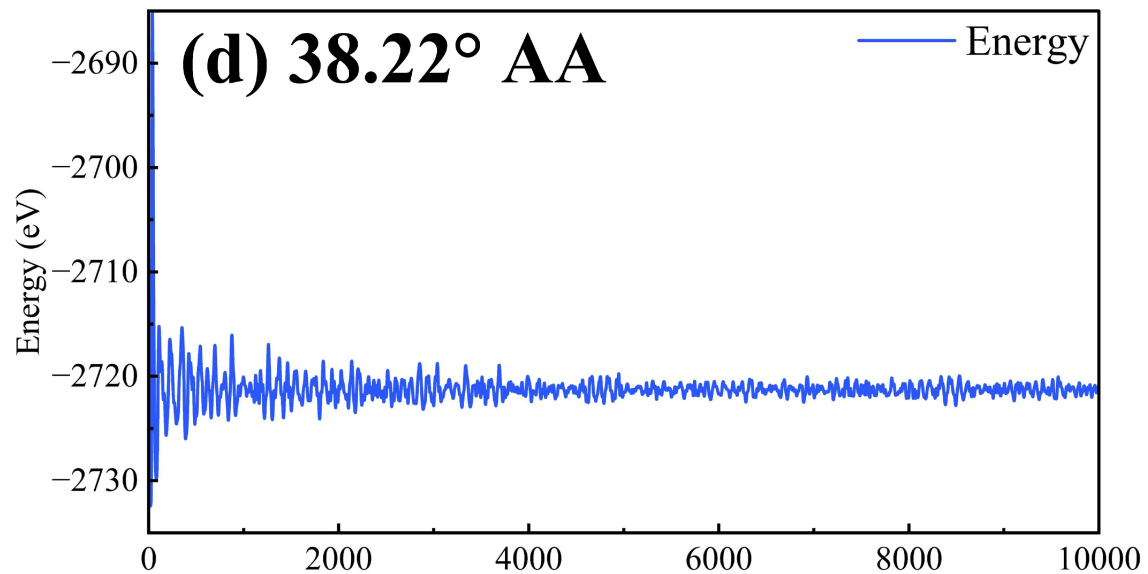

Supplement: d6nr01141a30.pdf [file d6nr01141a30.pdf]

**p1**

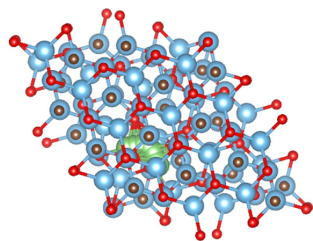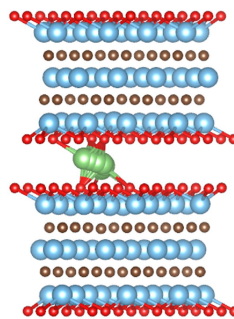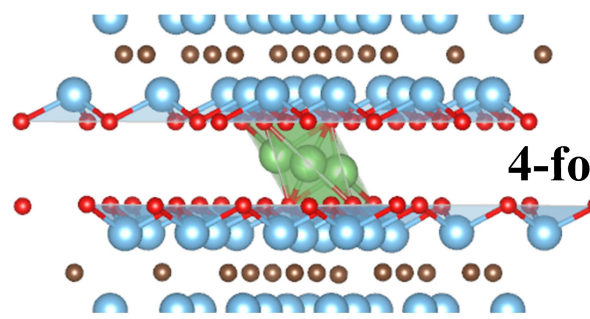

**4-fold → 4-fold → 4-fold**

**p2**

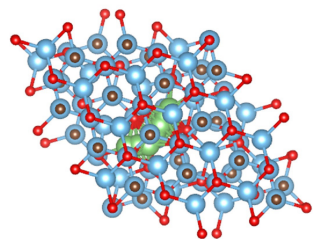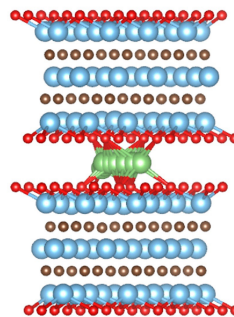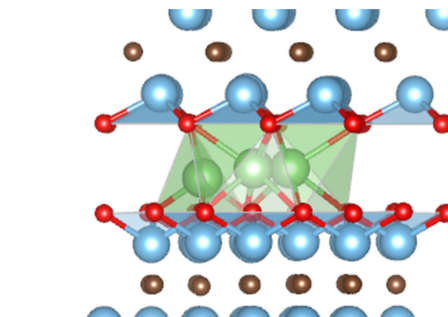

**4-fold → 6-fold → 6-fold**

**p3**

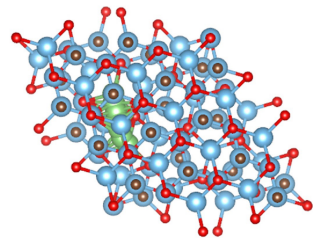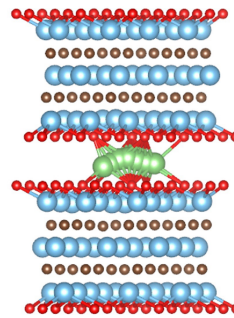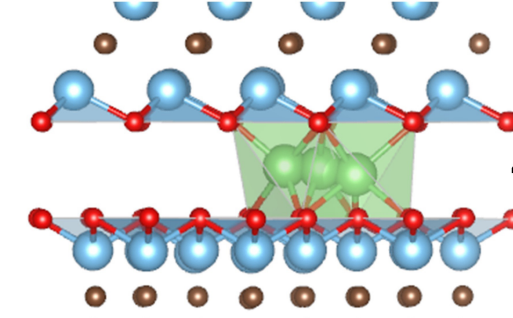

**4-fold → 5-fold → 6-fold**

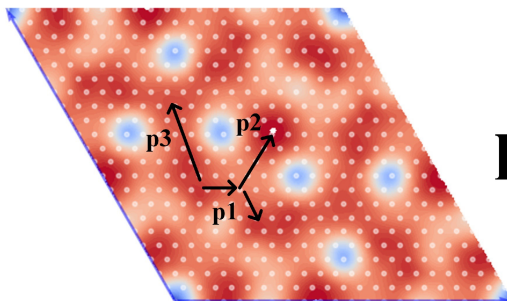

Supplement: d6nr01141a31.pdf [file d6nr01141a31.pdf]

**p1**

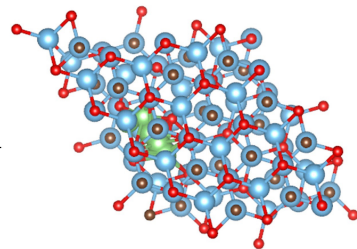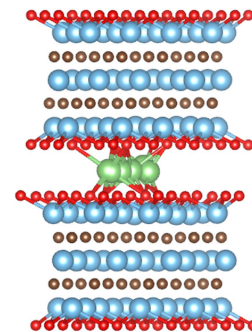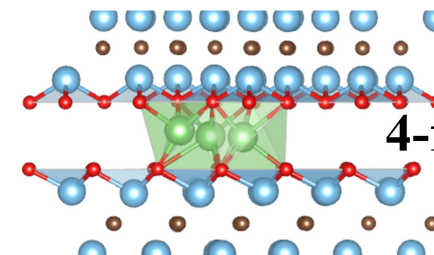

**4-fold → 6-fold → 6-fold**

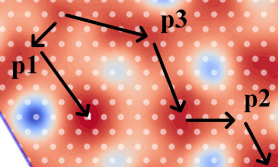

**p2**

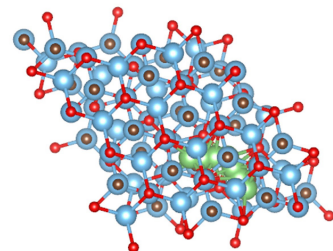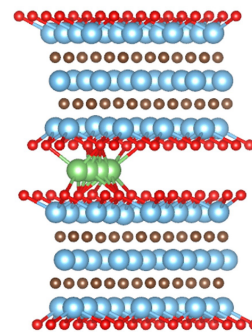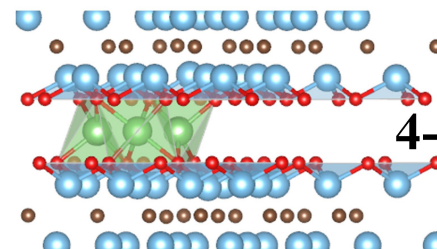

**4-fold → 6-fold → 4-fold**

**p3**

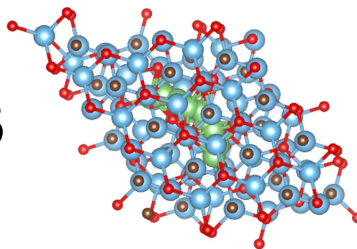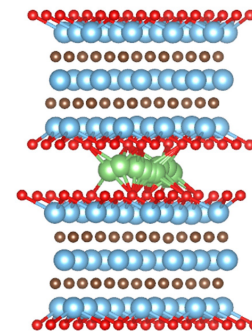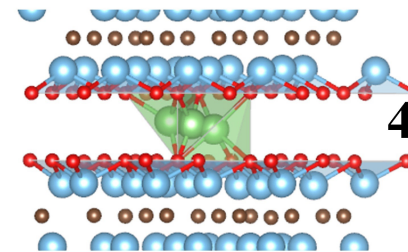

**4-fold → 3-fold → 5-fold**

Supplement: d6nr01141a32.pdf [file d6nr01141a32.pdf]

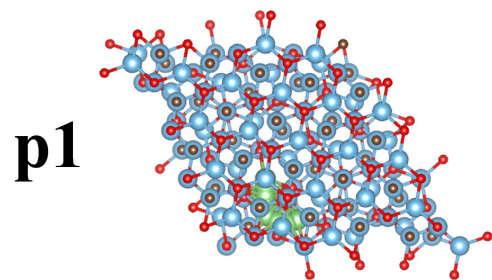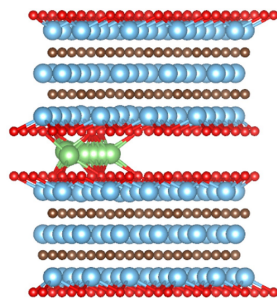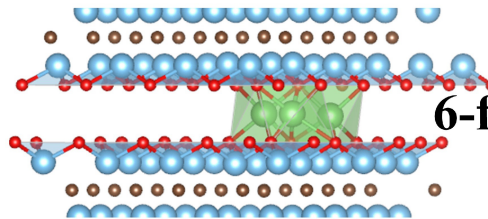

**6-fold → 6-fold → 5-fold**

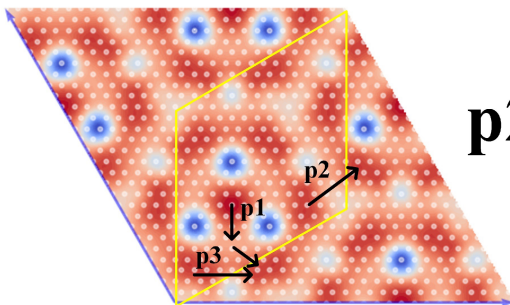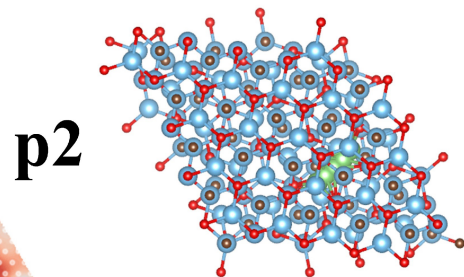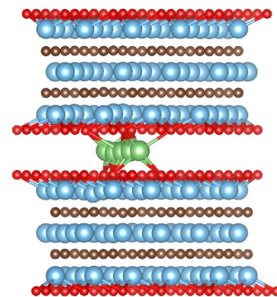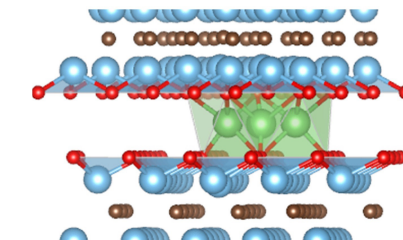

**5-fold → 4-fold → 5-fold**

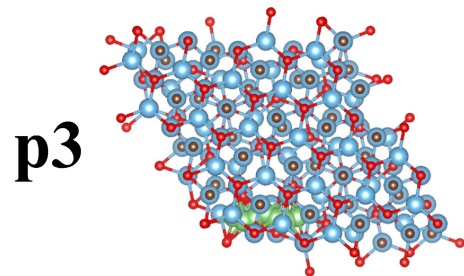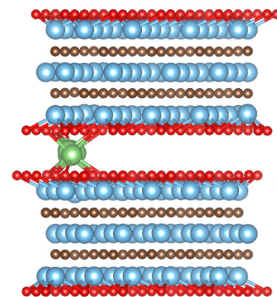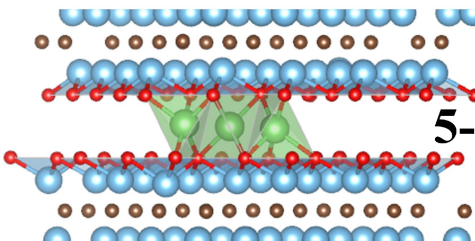

**5-fold → 4-fold → 5-fold**

Supplement: d6nr01141a33.pdf [file d6nr01141a33.pdf]

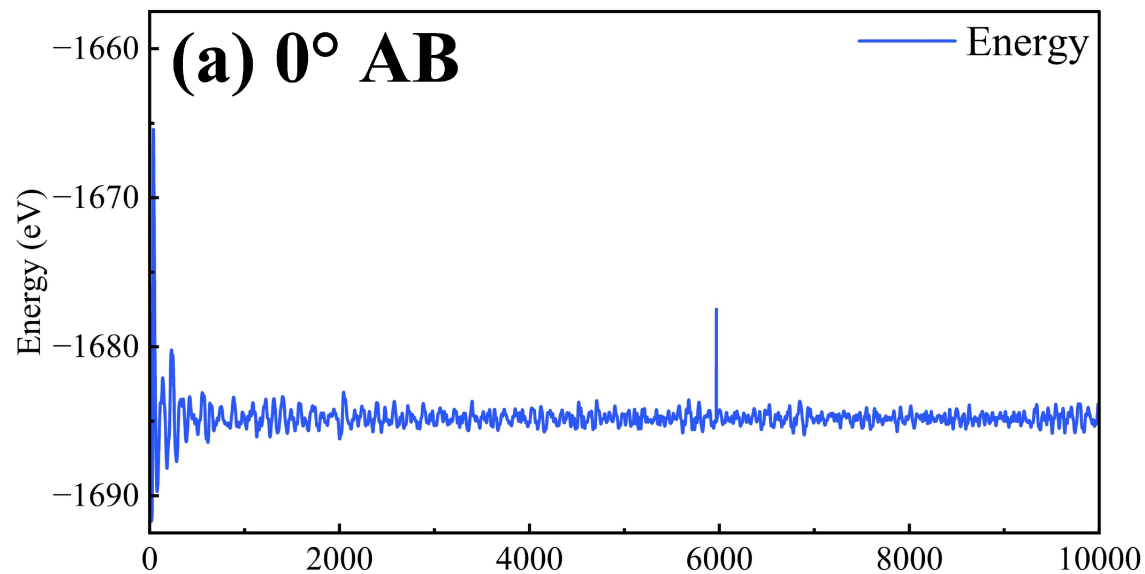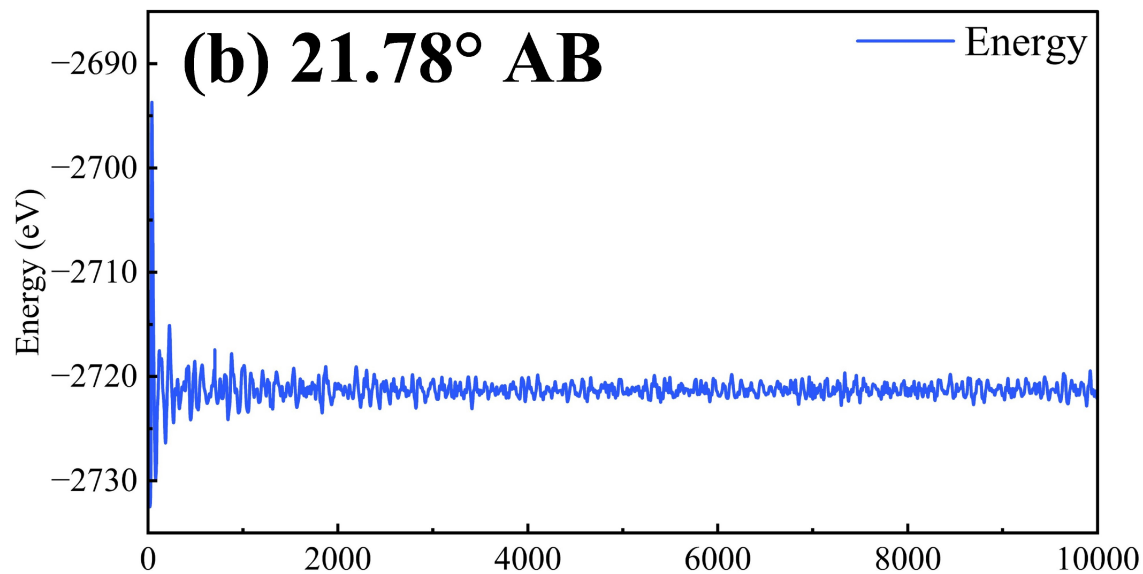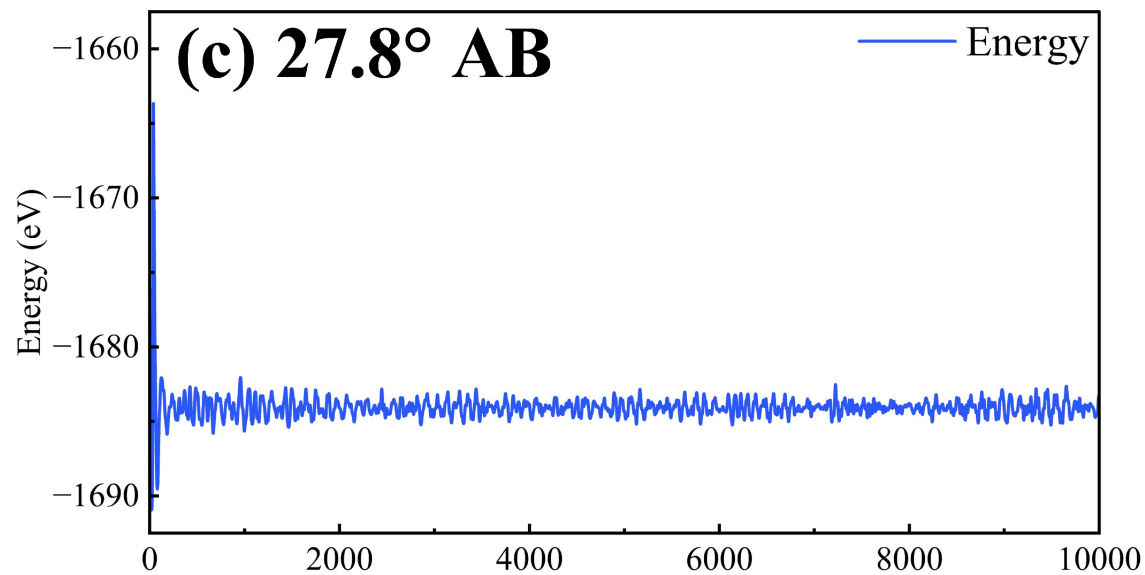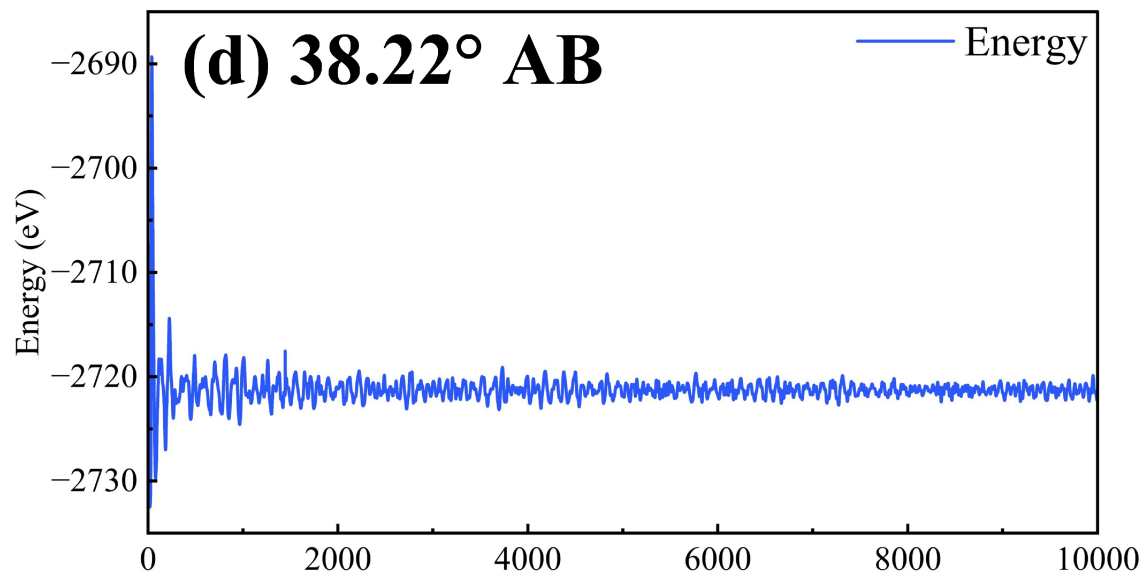

Supplement: d6nr01141a34.pdf [file d6nr01141a34.pdf]

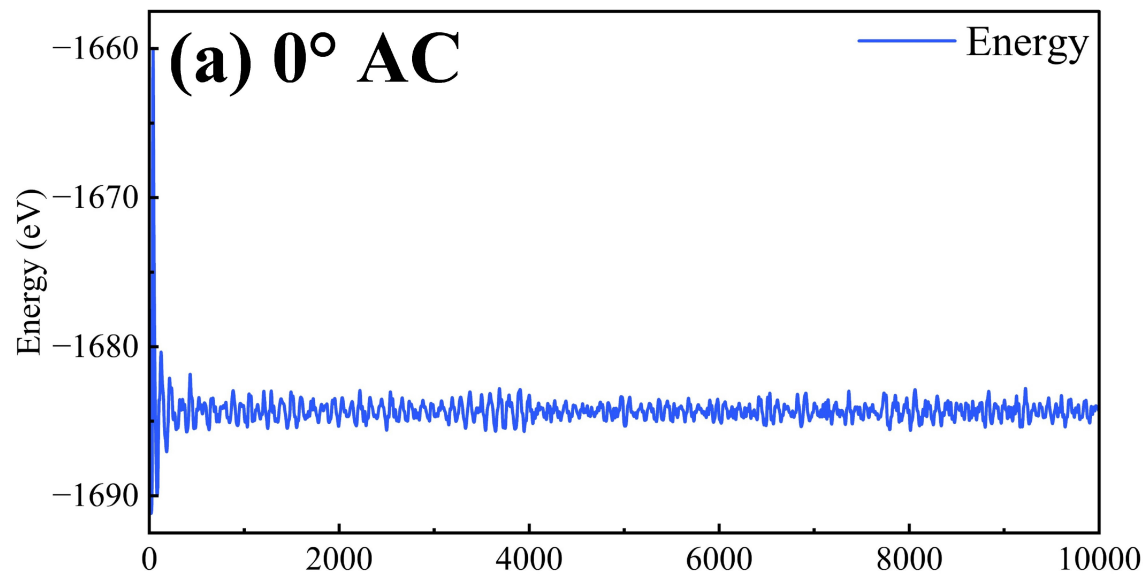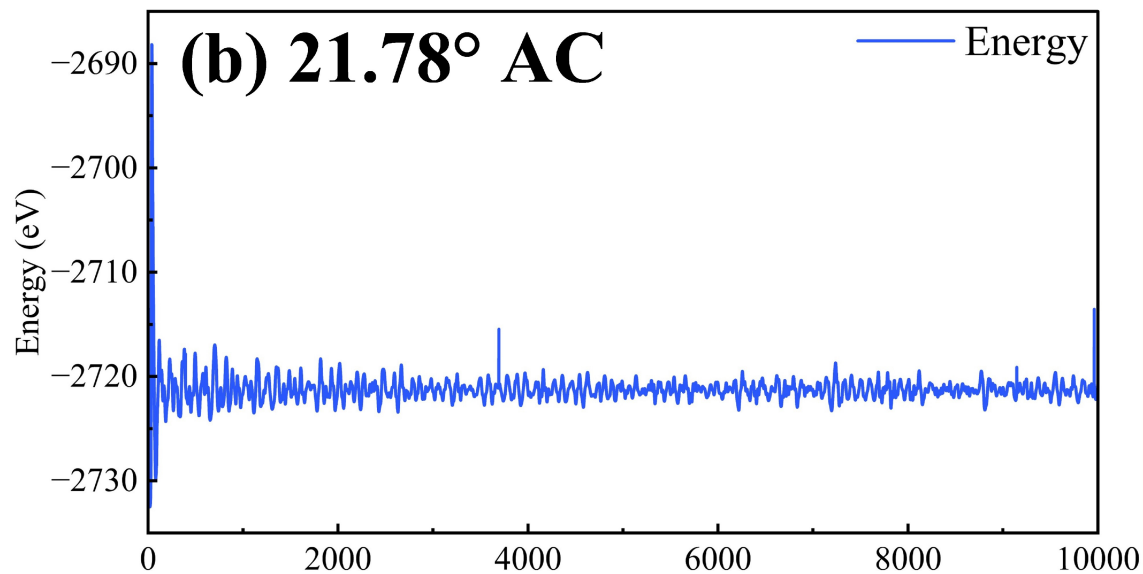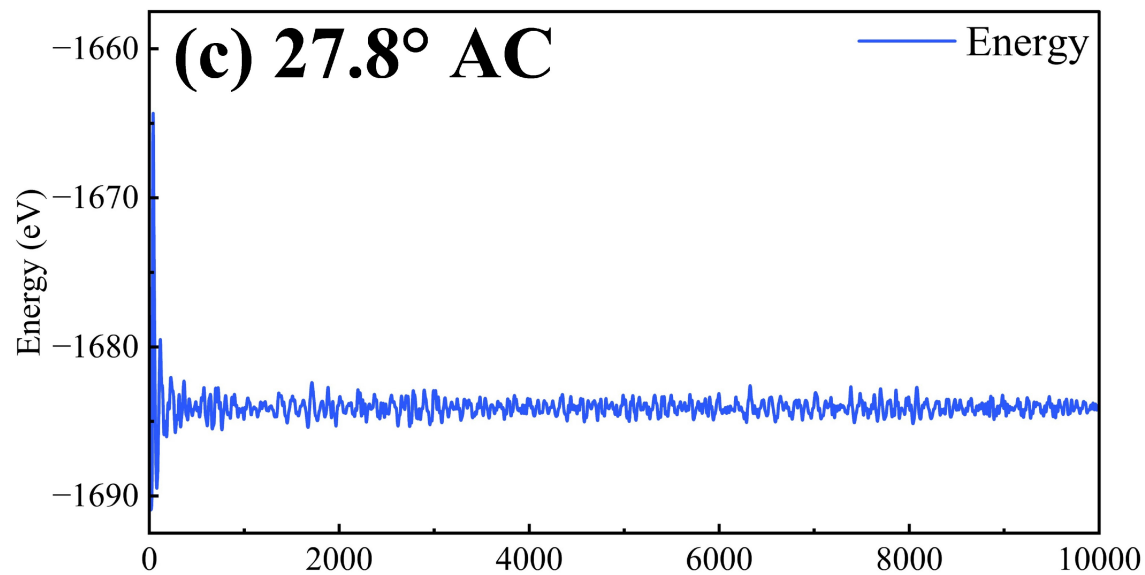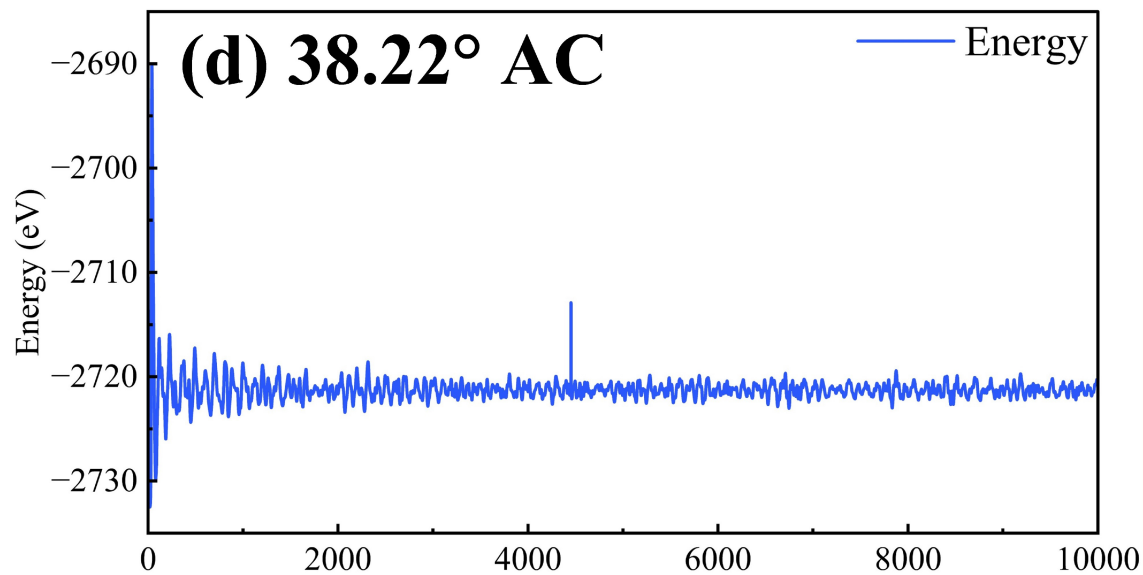

Supplement: d6nr01141a35.pdf [file d6nr01141a35.pdf]

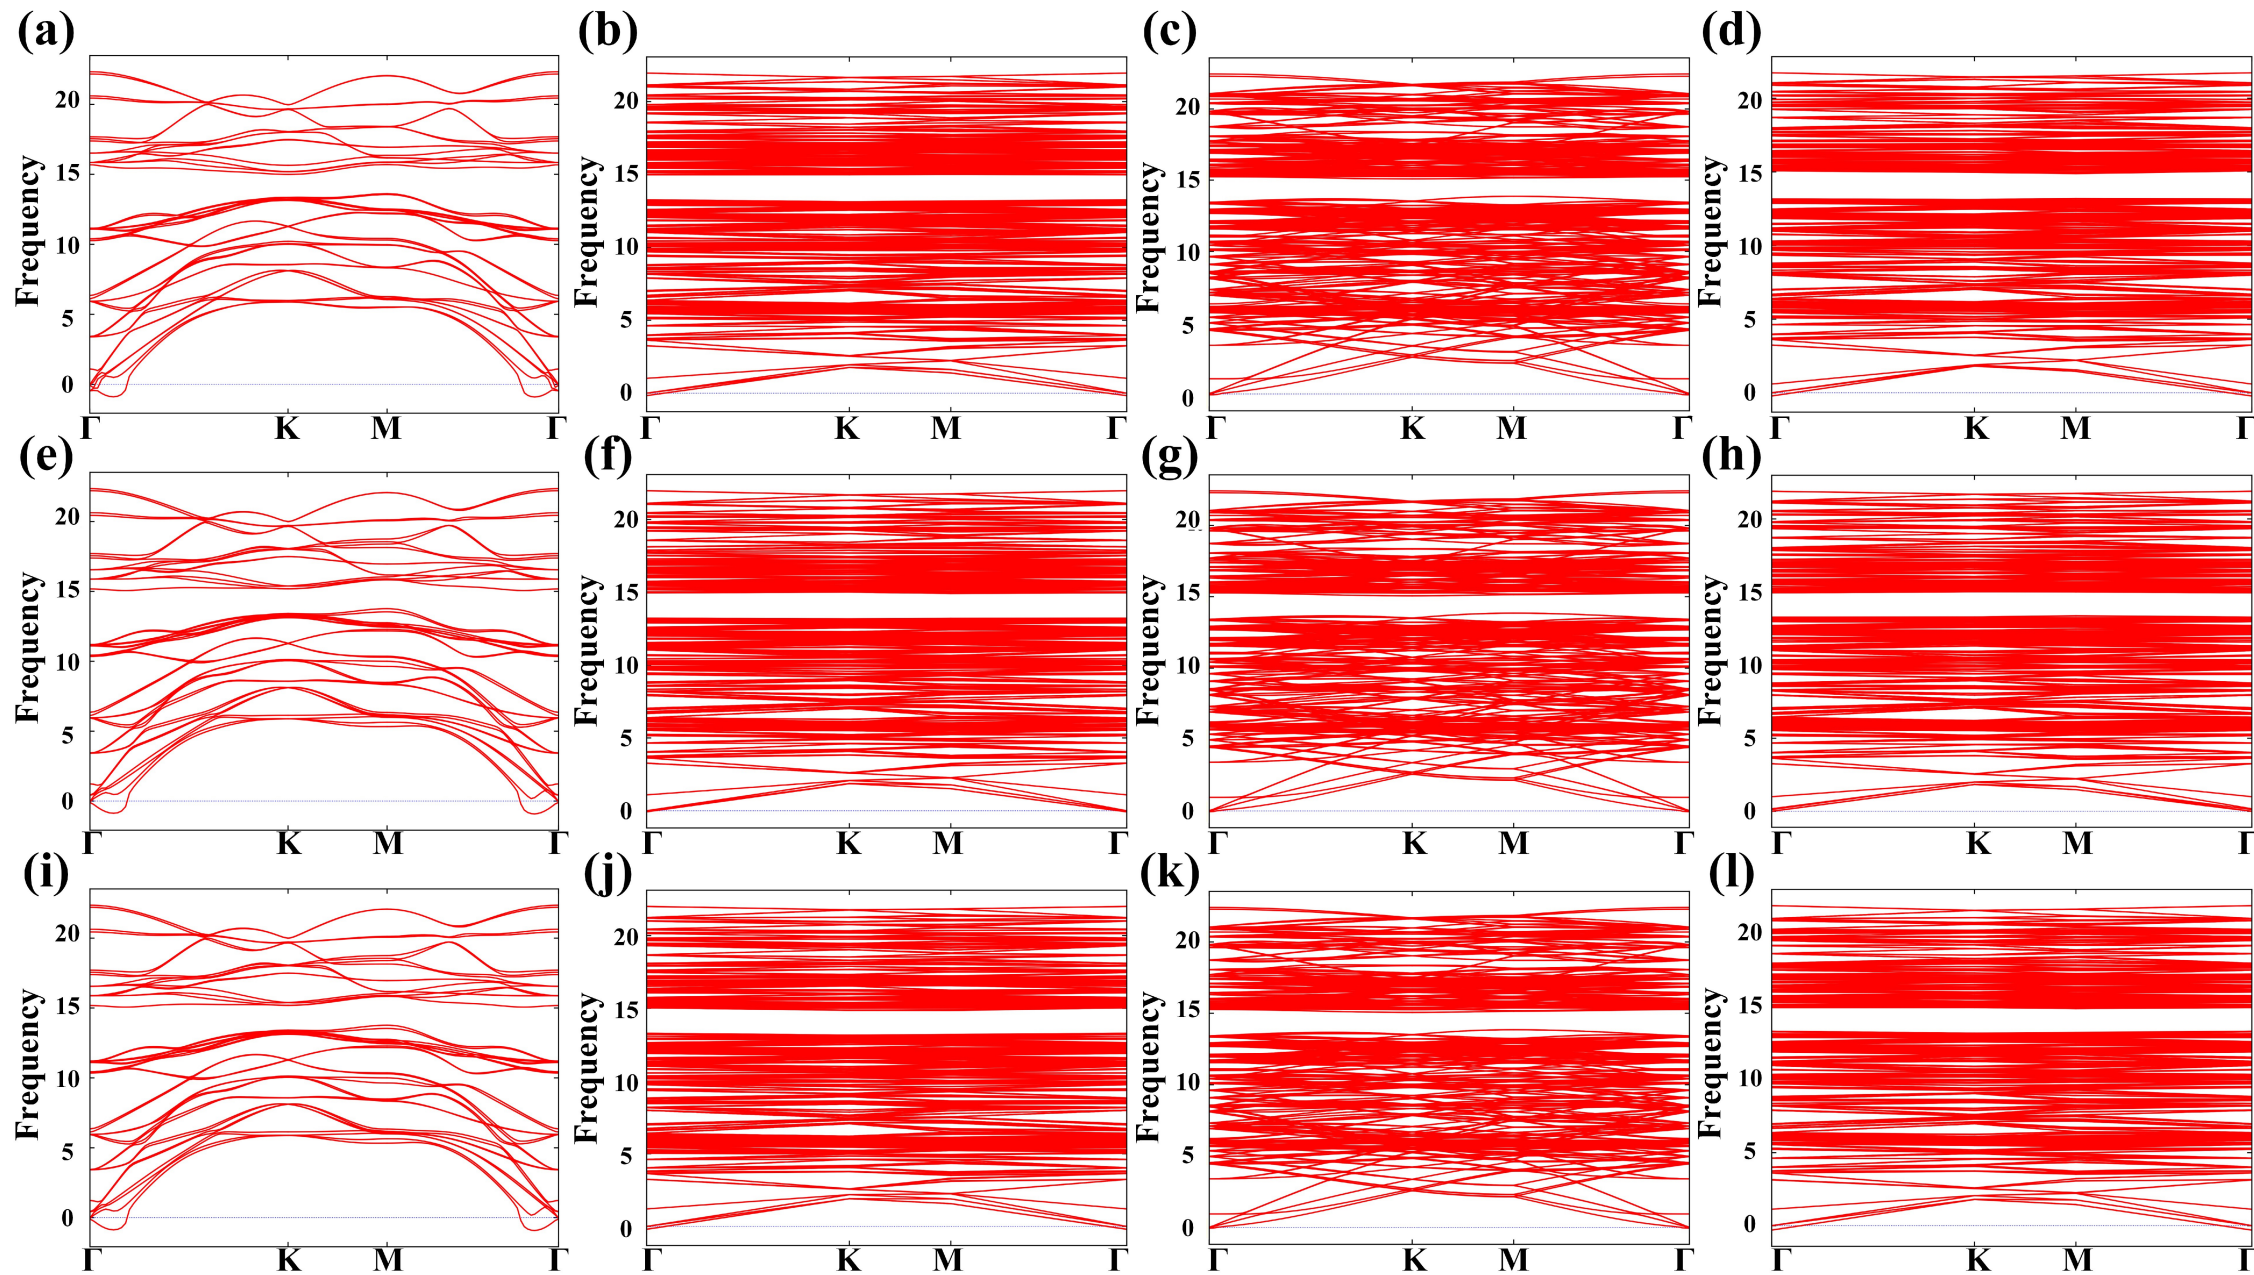

Supplement: d6nr01141a37.pdf [file d6nr01141a37.pdf]

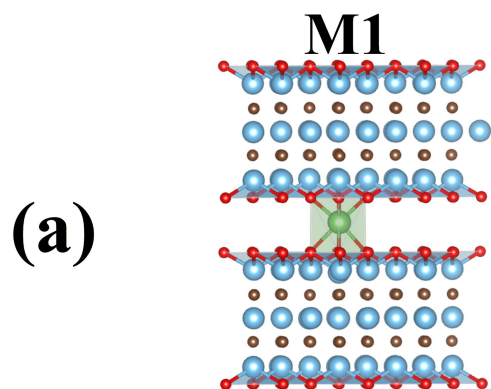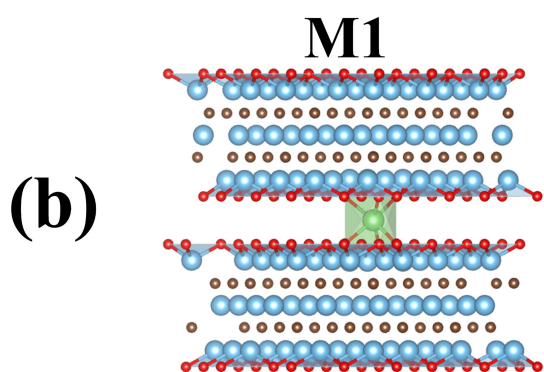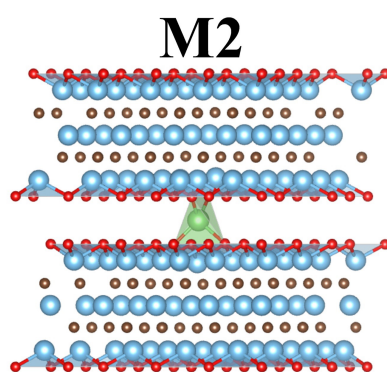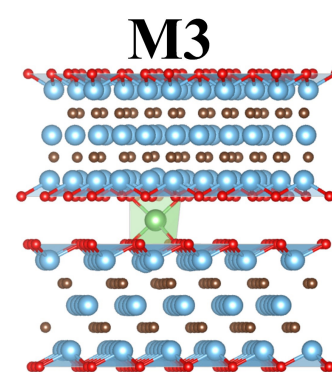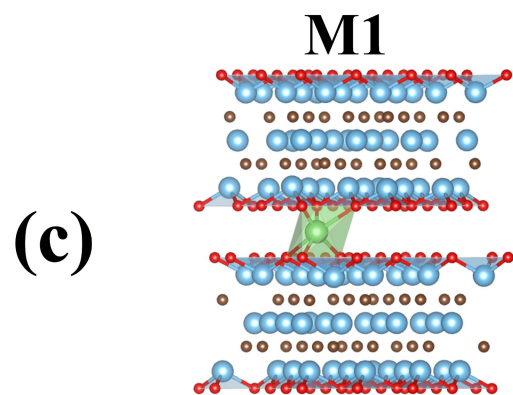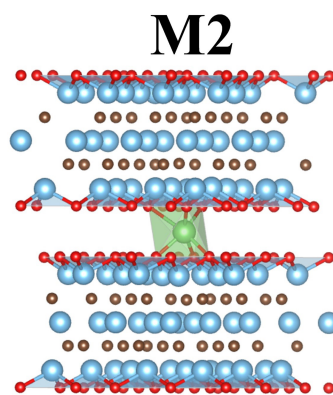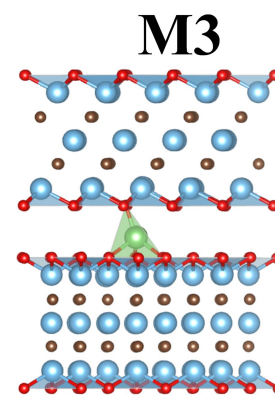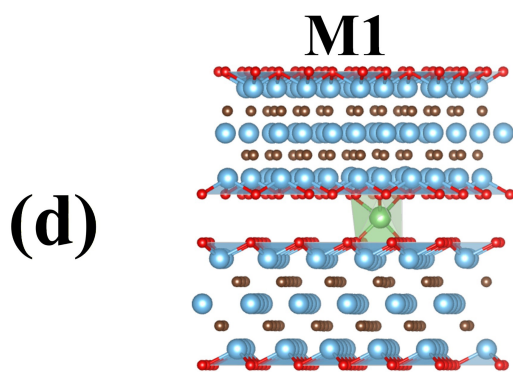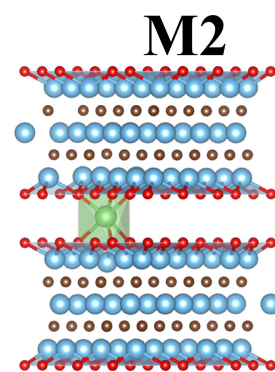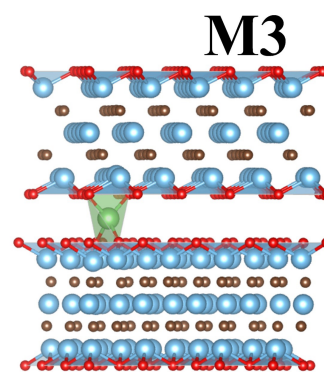

Supplement: d6nr01141a4.pdf [file d6nr01141a4.pdf]

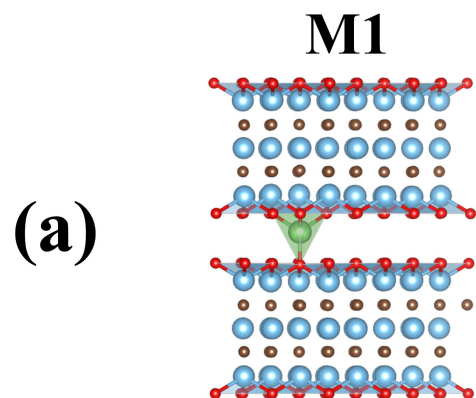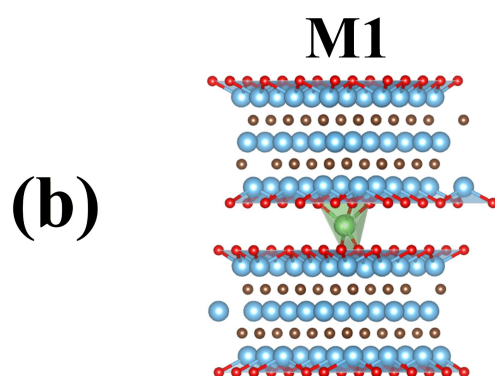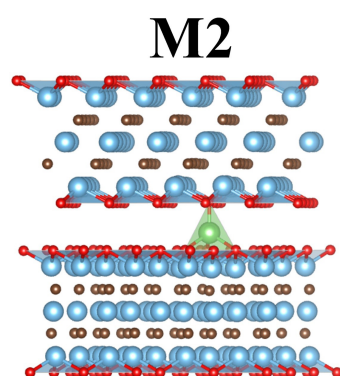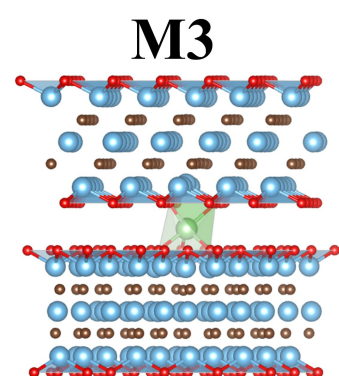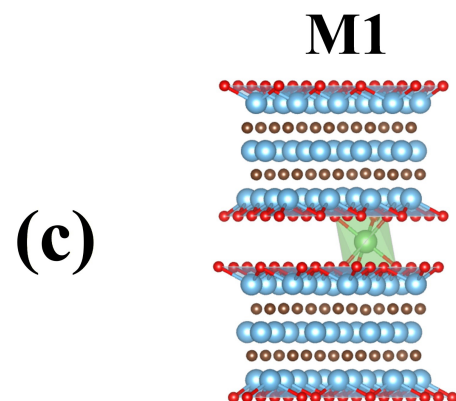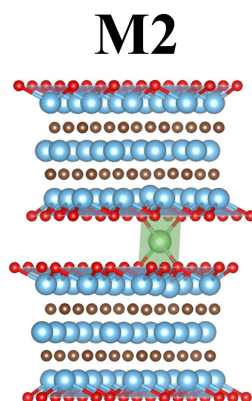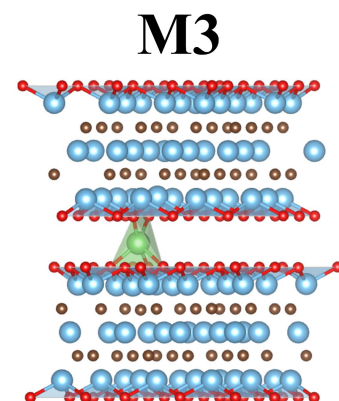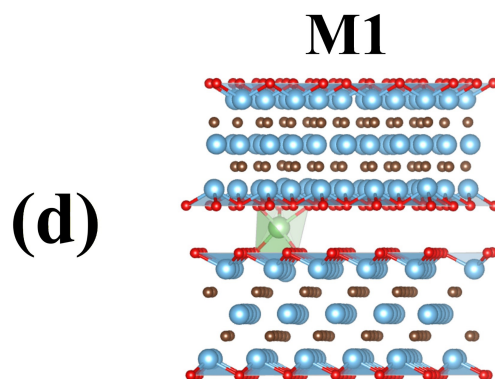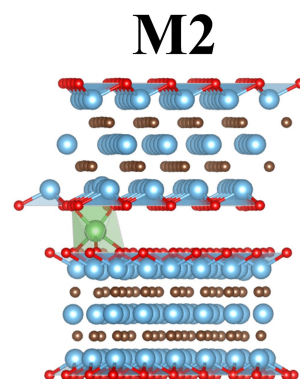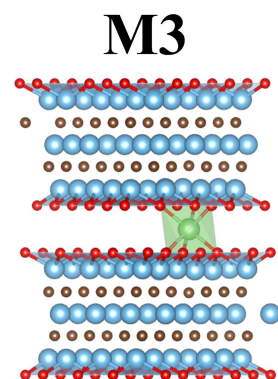

Supplement: d6nr01141a6.pdf [file d6nr01141a6.pdf]

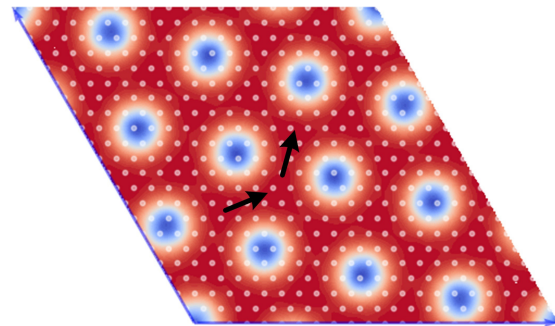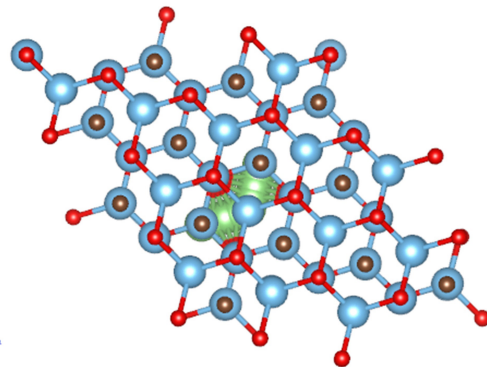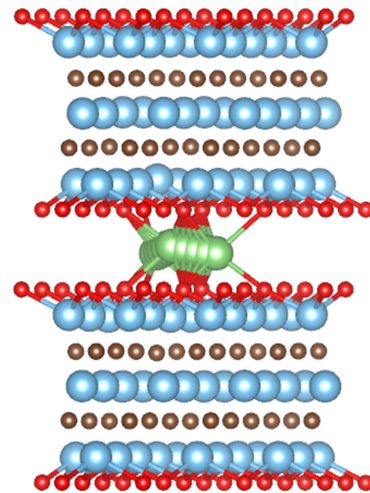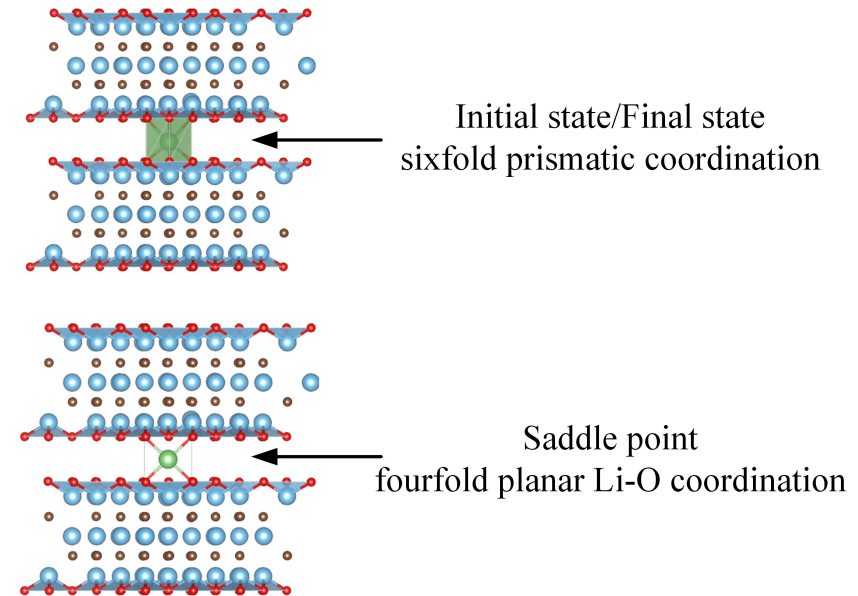

Supplement: d6nr01141a8.pdf [file d6nr01141a8.pdf]

**p1**

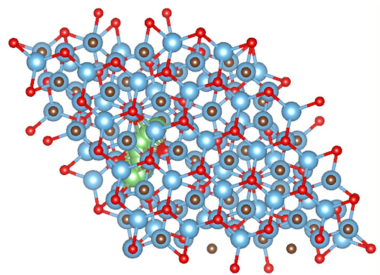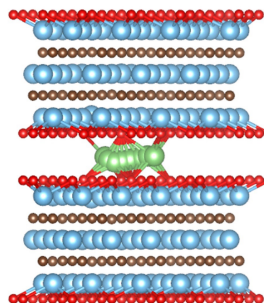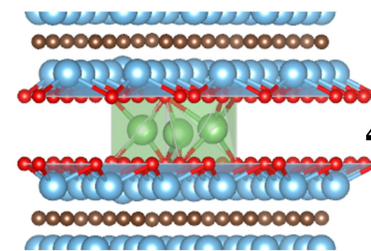

**4-fold → 3-fold → 5-fold**

**p2**

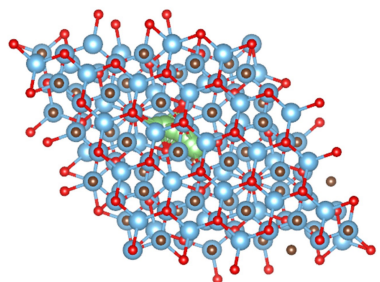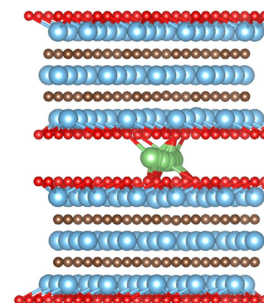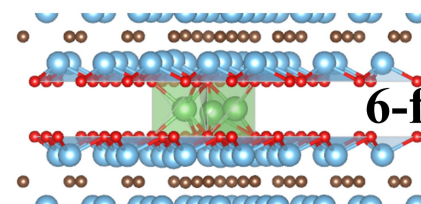

**6-fold → 4-fold → 4-fold**

**p3**

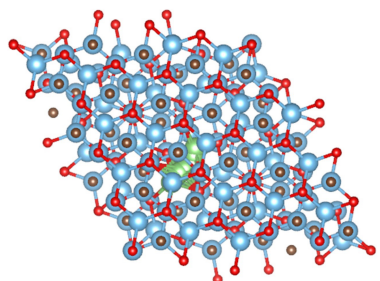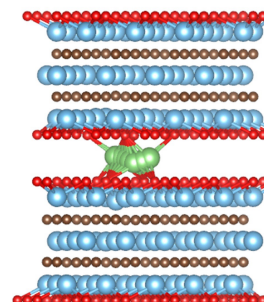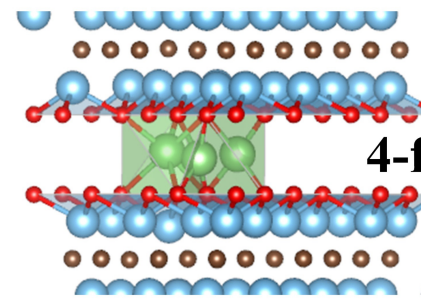

**4-fold → 4-fold → 6-fold**

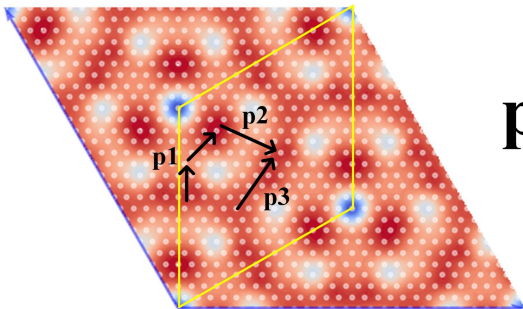

Supplement: d6nr01141a9.pdf [file d6nr01141a9.pdf]
